# Supplementary material for: Green water availability and water-limited crop yields under a changing climate in Ethiopia
Source: Copernicus journal article supplement (doi:10.5194/hess-29-863-2025), 2025-02-20
Supplement: Supplementary file 1 [file hess-29-863-2025-supplement.pdf]

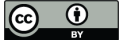

*Supplement of*

## **Green water availability and water-limited crop yields under a changing climate in Ethiopia**

**Mosisa Tujuba Wakjira et al.**

*Correspondence to:* Mosisa Tujuba Wakjira ([mosisatujuba@gmail.com](mailto:mosisatujuba@gmail.com), [wakjira@ifu.baug.ethz.ch](mailto:wakjira@ifu.baug.ethz.ch))

The copyright of individual parts of the supplement might differ from the article licence.

**Table S1:** List of the administrative zones within the nine regional states of Ethiopia based on pre-2010 divisions. The short names are arbitrary designations used in Fig. 1.

| Short name | Long name         | Region |
|------------|-------------------|--------|
| NWT        | North West Tigray | Tigray |
| CTI        | Central Tigray    |        |
| ETI        | Eastern Tigray    |        |
| STI        | Southern Tigray   |        |
| WTI        | Western Tigray    |        |
| ZO1        | Zone 1            | Afar   |
| ZO2        | Zone 2            |        |
| ZO3        | Zone 3            |        |
| ZO4        | Zone 4            |        |
| ZO5        | Zone 5            |        |
| NGO        | North Gondar      | Amhara |
| SGO        | South Gondar      |        |
| NWO        | North Wello       |        |
| SWO        | South Wello       |        |
| aNSH       | North Shewa       |        |
| EGO        | East Gojam        |        |
| WGO        | West Gojam        |        |
| WAG        | Wag Himra         |        |
| AWI        | Awi               |        |
| ORO        | Oromia            |        |
| WWL        | West Wellega      | Oromia |
| EWL        | East Wellega      |        |
| ILU        | Ilu Aba Bora      |        |
| JIM        | Jimma             |        |
| WSH        | West Shewa        |        |
| oNSH       | North Shewa       |        |
| ESH        | East Shewa        |        |
| ARS        | Arsi              |        |
| WHA        | West Hararge      |        |
| EHA        | East Hararge      |        |
| BAL        | Bale              |        |
| BOR        | Borena            |        |
| SWS        | South West Shewa  |        |
| GUJ        | Guji              |        |
| wARS       | West Arsi         |        |
|            |                   |        |

| Short name | Long name       | Region           |
|------------|-----------------|------------------|
| SHI        | Shinile         | Somali           |
| FAF        | Fafan           |                  |
| LIB        | Liben           |                  |
| AFD        | Afder           |                  |
| DOL        | Dolo            |                  |
| JAR        | Jarar           |                  |
| SHB        | Shabelle        |                  |
| KOR        | Korahe          |                  |
| SIT        | Siti            |                  |
| NOG        | Nogob           |                  |
| MET        | Metekel         | Benishangul-gumz |
| ASO        | Asosa           |                  |
| KEM        | Kemashi         |                  |
| GUR        | Gurage          | SNNPR            |
| HAD        | Hadiya          |                  |
| KET        | Kembata Tibaro  |                  |
| KEF        | Kefa            |                  |
| GGO        | Gamo Gofa       |                  |
| BMJ        | Bench Maji      |                  |
| YEM        | Yem Special     |                  |
| AMA        | Amaro Special   |                  |
| BUR        | Burji Special   |                  |
| KONs       | Konso Speical   |                  |
| DER        | Derashe Special |                  |
| DAW        | Dawuro          |                  |
| BAS        | Basketo Special |                  |
| KON        | Konta Special   |                  |
| SIL        | Siltie          |                  |
| ALB        | Alaba Special   |                  |
| ALL        | Alle            |                  |
| WOL        | Wolaita         |                  |
| SOM        | South Omo       | Sidama           |
| SID        | Sidama          |                  |
| AGN        | Agnuak          | Gambela          |
| MAJ        | Majang          |                  |
| NUE        | Nuer            |                  |

**Table S2:** List of the CMIP6 model projections used for the projection of the precipitation, maximum and minimum temperature and incoming shortwave radiation over Ethiopia. The ‘x’ marks show the variables that were used from the indicated model.

| Model            | Institution (country/region) <sup>1</sup> | Precip | Tmax | Tmin | Rsw | Reference                  |
|------------------|-------------------------------------------|--------|------|------|-----|----------------------------|
| ACCESS-CM2       | CSIRO (Australia)                         | x      | x    | x    | x   | (Bi et al., 2020)          |
| AWI-CM-1-1-MR    | AWI (Germany)                             | x      | x    | x    | x   | (Semmler et al., 2020)     |
| BCC-CSM2-MR      | BCC (Asia)                                | x      |      |      | x   | (Wu et al., 2019)          |
| CAMS-CSM1-0      | CAMS (China)                              | x      |      |      | x   | (Rong et al., 2019)        |
| CanESM5-CanOE    | CCCma (Canada)                            | x      | x    | x    | x   | (Christian et al., 2022)   |
| CESM2            | NCAR (USA)                                | x      |      |      | x   | (Danabasoglu et al., 2020) |
| CIESM            | THU (China)                               |        | x    | x    |     | (Lin et al., 2020)         |
| CMCC-CM2-SR5     | CMCC (Italy)                              | x      |      |      | x   | (Cherchi et al., 2019)     |
| CMCC-ESM2        |                                           | x      | x    | x    | x   | (Lovato et al., 2022)      |
| CNRM-CM6-1       | CNRM (France)                             | x      | x    | x    | x   | (Voldoire et al., 2019)    |
| CNRM-CM6-1-HR    |                                           | x      | x    | x    | x   |                            |
| CNRM-ESM2-1      |                                           | x      | x    | x    | x   |                            |
| EC-Earth3-Veg-LR | EC-Earth (Europe)                         |        | x    | x    |     | (Döscher et al., 2022)     |
| FGOALS-g3        | CAS (China)                               | x      | x    | x    | x   | (Li et al., 2020)          |
| FIO-ESM-2-0      | FIO-QNLM (China)                          | x      | x    | x    | x   | (Bao et al., 2020)         |
| GFDL-ESM4        | NOAA-GFDL (USA)                           | x      | x    | x    | x   | (Dunne et al., 2020)       |
| HadGEM3-GC31-LL  | MOHC (UK)                                 | x      | x    | x    | x   | (Andrews et al., 2020)     |
| IITM-ESM         | CCCR-IITM (India)                         | x      | x    | x    | x   | (David A. et al., 2019)    |
| INM-CM4-8        | INM (Russia)                              |        | x    | x    |     | (Volodin et al., 2018)     |
| INM-CM5-0        |                                           | x      | x    | x    | x   |                            |
| IPSL-CM6A-LR     | IPSL (France)                             | x      | x    | x    | x   | (Boucher et al., 2020)     |
| MIROC6           | MIROC (Japan)                             | x      | x    | x    | x   | (Tatebe et al., 2019)      |
| MIROC-ES2L       |                                           | x      | x    | x    | x   | (Hajima et al., 2020)      |
| MPI-ESM1-2-LR    | MPI (Germany)                             | x      | x    | x    | x   | (Gutjahr et al., 2019)     |
| NESM3            | NUIST (China)                             | x      |      |      | x   | (Cao et al., 2018)         |
| NorESM2-MM       | NCC (Norway)                              | x      |      |      | x   | (Seland et al., 2020)      |
| TaiESM1          | AS-RCEC (Taiwan)                          | x      |      |      | x   | (Wang et al., 2021)        |
| UKESM1-0-LL      | MOHC (UK)                                 | x      | x    | x    | x   | (Sellar et al., 2019)      |

<sup>1</sup> The full names of the institutions can be found in (IPCC, 2021)

**Table S3:** List of the 20 surface runoff measurement sites and measurement periods collected from published literature for the validation of the simulated surface runoff.

| Measurement site | Lat (° N) | Lon (° E) | Measurement periods<br>(Values used in the evaluation) | Reference                                                |
|------------------|-----------|-----------|--------------------------------------------------------|----------------------------------------------------------|
| Maybar           | 11.02     | 39.67     | 1982-1993 (mean)                                       | (Herweg and Stillhardt, 1999)<br>(Herweg and Ludi, 1999) |
| Hunde lafto      | 9.07      | 41.00     | 1983-1993 (mean)                                       |                                                          |
| Andit Tid        | 9.80      | 39.72     | 1982-1992 (mean)                                       |                                                          |
| Gununo           | 6.92      | 37.65     | 1985-1993 (mean)                                       |                                                          |
| Anjeni           | 10.81     | 37.57     | 1985-1993 (annual)                                     |                                                          |
| Dendi            | 9.13      | 37.12     | 2007-2009 (annual)                                     | (Adimassu et al., 2014)                                  |
| Holeta           | 9.07      | 38.48     | 2009-2010 (annual)                                     | (Adimassu et al., 2019)                                  |
| Debre Mawi       | 11.33     | 37.43     | 2008-2009 (annual)                                     | (Amare et al., 2014)                                     |
| Chefe donsa      | 8.96      | 39.11     | 2001-2002 (annual)                                     | (Erkossa et al., 2006)                                   |
| Dera             | 8.36      | 39.34     | 2004 (annual)                                          | (Welderufael et al., 2008)                               |
| Yeku             | 12.52     | 39.07     | 2003 (annual)                                          | (Collick et al., 2009)                                   |
| Guder*           | 8.95      | 37.75     | 2003 (annual)                                          | (Tumsa et al., 2022)                                     |
| Dodota*          | 11.50     | 39.92     | 1994-2000 (mean)                                       | (Teso et al., 2010)                                      |
| Keleta           | 8.12      | 39.46     | 1981, 1990 (annual)                                    | (Tibebe and Bewket, 2011)                                |
| Suluh*           | 13.80     | 39.50     | 1992-2003 (mean)                                       | (Abebe, 2014)                                            |
| Hare*            | 6.25      | 37.55     | 1990-1999 (mean)                                       | (Wagesho et al., 2013)                                   |
| Bilate*          | 7.50      | 37.94     | 1990-1999 (mean)                                       |                                                          |
| Hagere Selam     | 13.65     | 39.17     | 2003-2004 (annual)                                     | (Descheemaeker et al., 2006)                             |
| Adigudem         | 13.233    | 39.53     | 2005-2007 (annual)                                     | (Araya et al., 2011)                                     |
| Jigjiga          | 9.47      | 42.63     | 2004-2005 (annual)                                     | (Welle et al., 2006)                                     |

\*These are model-calibrated surface runoff data: Guder (SWAT+), Dodota (SWAT), Suluh (HEC-HMS), Hare and Bilate (SWAT)

**Table S4:** List of the case study sites and Global Yield Gap Atlas (GYGA) stations at which the water-limited attainable yield (AY) were compared with the measured (field trials), crop model-simulated, or GYGA-derived ratio of water-limited (Y<sub>w</sub>) and potential (Y<sub>p</sub>) yields. The data from the field trials and model simulations correspond to various crops including maize, sorghum, wheat, rice, soya bean, faba bean, and chickpea. The GYGA data were collected for maize.

| Experimental site          | Lat (° N) | Lon (° E) | Crop      | Years of experiment | Reference                   |
|----------------------------|-----------|-----------|-----------|---------------------|-----------------------------|
| Hawassa, Sidama            | 7.028     | 38.482    | Wheat     | 2009                | (Kassie et al., 2014)       |
| Ziway (Batu), East Shoa    | 7.882     | 38.714    | Wheat     | 2004                |                             |
| Sinana, Bale**             | 7.117     | 40.167    | Maize     | 2014-2015           | (Dinsa and Bogale, 2023)    |
| Kersa, Jimma*              | 7.750     | 37.080    | Soya bean | 1987-2019           | (Mekonnen et al., 2022)     |
| Limu Seka, Jimma*          | 7.595     | 36.723    |           | 1987-2019           |                             |
| Omonada, Jimma*            | 7.599     | 37.250    |           | 1987-2019           |                             |
| Tiro Afeta, Jimma*         | 7.854     | 37.238    |           | 1987-2019           |                             |
| Bishoftu, East Shoa        | 8.765     | 39.005    | Wheat     | 1987-1988           | (Astatke et al., 1991)      |
| Sekota, Waghimra**         | 12.680    | 39.010    | Sorghum   | 2014-2015           | (Wale et al., 2019)         |
| Fogera, South Gondar**     | 11.833    | 37.628    | Rice      | 2015-2016           | (Molla et al., 2021)        |
| Mekele, East Tigray**      | 13.483    | 39.583    | Wheat     | 2012                | (Girmay, 2017)              |
| Sirinka, North Wollo**     | 12.080    | 39.280    | Sorghum   | 2011-2012           | (Wondatir and Getnet, 2021) |
| Gondar, North Gondar**     | 12.467    | 37.483    | Chickpea  | 2015-2016           | (Kemal et al., 2019)        |
| Halaba, Alaba Woreda**     | 7.283     | 37.010    | Maize     | 2012-2013           | (Muluneh et al., 2017)      |
| Debre Tabor, South Gondar* | 11.850    | 38.017    | Faba bean | 2000-2009           | (Mulugeta et al., 2019)     |
| Bekoji, Arsi*              | 7.544     | 39.256    |           |                     |                             |
| Meraro, Arsi*              | 7.408     | 39.249    |           |                     |                             |
| Arsi-Robe, Arsi*           | 7.884     | 39.628    |           |                     |                             |
| Gasera, Bale*              | 7.367     | 40.300    |           |                     |                             |
| Adadi, Southwest Shoa*     | 8.633     | 38.013    |           |                     |                             |
| Kofle, West Arsi*          | 7.074     | 38.795    |           |                     |                             |
| Bulle, Gedio*              | 6.300     | 38.417    |           |                     |                             |
| Hosena, Hadiya*            | 7.568     | 37.856    |           |                     |                             |
| Angacha, Kembata-tembaro*  | 7.333     | 37.850    |           |                     |                             |
| Kokate, Wolayita*          | 6.822     | 37.749    |           |                     |                             |
| Adet, West Gojjam          | 11.27     | 37.48     |           |                     |                             |
| Ambo, West Shoa            | 8.96      | 37.835    |           |                     |                             |
| Arbaminch, Gamo Gofa       | 6.05      | 37.4      |           |                     |                             |
| Areka, Wolayita            | 7.04      | 37.45     |           |                     |                             |
| Assosa, Assosa             | 10.07     | 34.52     |           |                     |                             |
| Ayira, Kelem Wollega       | 9.06      | 35.33     |           |                     |                             |
| Bahir Dar, Bahir Dar       | 11.58     | 37.38     |           |                     |                             |
| Bako, West Shoa            | 9.07      | 37.03     |           |                     |                             |
| Butajira, Gurage           | 8.08      | 38.22     |           |                     |                             |
| Debre Markos, East Gojjam  | 10.33     | 37.736    |           |                     |                             |
| Gore, Illubabor            | 8.02      | 35.53     |           |                     |                             |

|                                        |         |         |
|----------------------------------------|---------|---------|
| Haramaya, East Hararge                 | 9.4     | 42.03   |
| Harar, East Hararge                    | 9.31    | 42.1    |
| Jimma, Jimma                           | 7.84    | 36.43   |
| Kulumsa, Arsi                          | 8       | 39.15   |
| Melkassa, East Shoa                    | 8.4     | 39.33   |
| Nekemte, East Wollega                  | 9.09    | 36.54   |
| Pawe, Metekel                          | 11.31   | 36.403  |
| Shambu, Horro Guduru Wollega           | 9.57117 | 37.1212 |
| Shire Endasilasse, Northwestern Tigray | 14.1    | 38.334  |
| Woliso, Southwest Shoa                 | 8.55    | 37.97   |
| Wolkite, Gurage                        | 8.27    | 37.78   |

\*These are model-simulated data

\*\* The measurement periods fall outside the reference period (1981-2010) of this study. However, these data remain valuable for evaluating the simulated results. These were compared to the average simulated AY for the later years (2007-2010), while all others were compared with the average for the specific years of the experiments indicated in the table.

**Table S5:** Published potential (fully irrigated, optimally fertilized) maize yields measured at 14 experimental sites across the RFA region of Ethiopia, used for the analysis of yield gaps.

| Experimental site           | Potential yield, Y <sub>p</sub> (ton/ha) | Lat (° N) | Lon (° E) | Reference                           |
|-----------------------------|------------------------------------------|-----------|-----------|-------------------------------------|
| Salaklaka, Northwest Tigray | 7.3                                      | 14.3      | 38.72     | (Gebreigziabher, 2020)              |
| Melkasa, East Shoa          | 7.9                                      | 8.4       | 39.35     | (Seid, Mulugeta M; Narayanan, 2015) |
| Boloso Sore, Wolayta        | 8.8                                      | 7.0       | 37.75     | (Chinasho et al., 2023)             |
| Tepi, SW Ethiopia           | 6.8                                      | 7.187     | 35.42     | (Zelege, 2020)                      |
| Raya, South Tigray          | 8.7                                      | 12.7      | 39.7      | (Mehari et al., 2020)               |
| Arba Minch, Gamo Gofa       | 8.0                                      | 6.08      | 37.58     | (Setu et al., 2023)                 |
| Koga, West Gojam            | 5.9                                      | 11.37     | 37.12     | (Abiyu and Alamirew, 2015)          |
| Haru ARC, West Wollega      | 8.4                                      | 8.90      | 35.87     | (Admasu et al., 2017)               |
| Adami Tulu, East Shoa       | 4.5                                      | 7.75      | 38.65     | (Furgassa, 2017)                    |
| Mehoni, South Tigray        | 5.7                                      | 12.87     | 39.64     | (Mebrahtu and Mehamed, 2019)        |
| Haramaya, East Hararge      | 7.1                                      | 9.417     | 42.04     | (Mengiste and Tilahun, 2009)        |
| Hawassa, Sidama             | 9.0                                      | 7         | 38        | (Jemal and Berhanu, 2020)           |
| Koka, East Shoa             | 6.3                                      | 8.43      | 39        | (Meskelu et al., 2018)              |
| Gumselasa, South Tigray     | 9.9                                      | 13.25     | 39.51     | (Mintesinot et al., 2004)           |

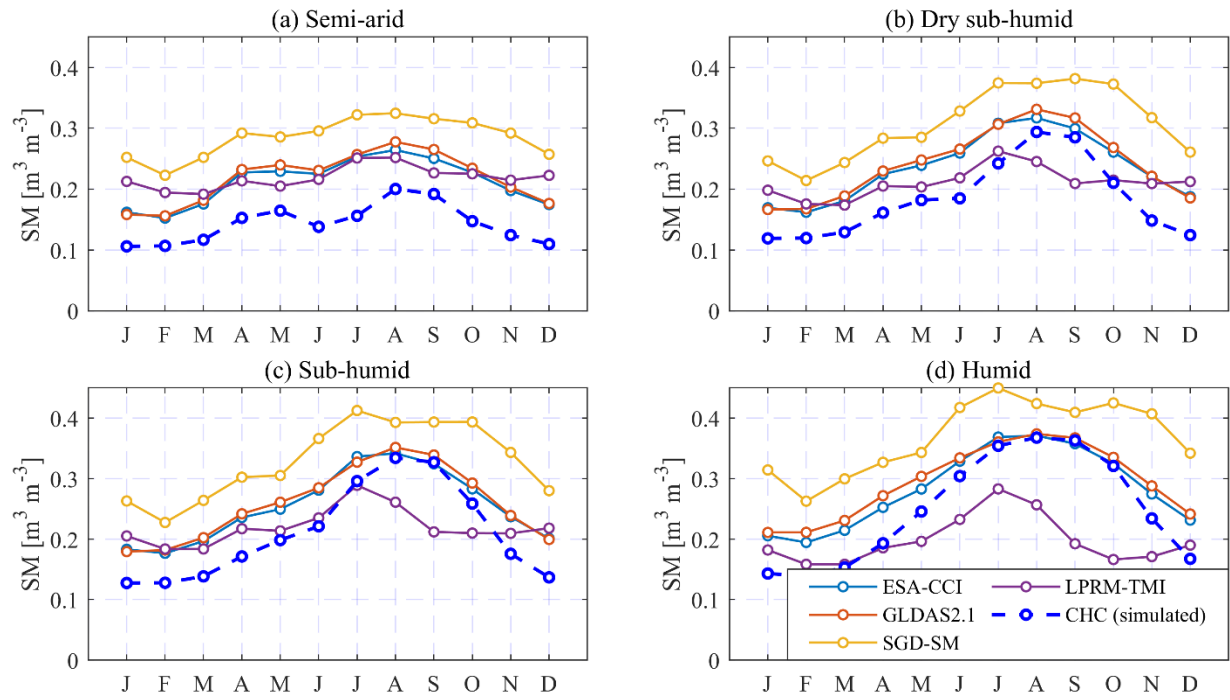

Figure S1 Comparison of area-averaged annual cycles of the simulated and satellite and model-based global soil moisture (SM) datasets across the four climatic regimes (see Figure 1c in the main article) for the record period 2003-2010.

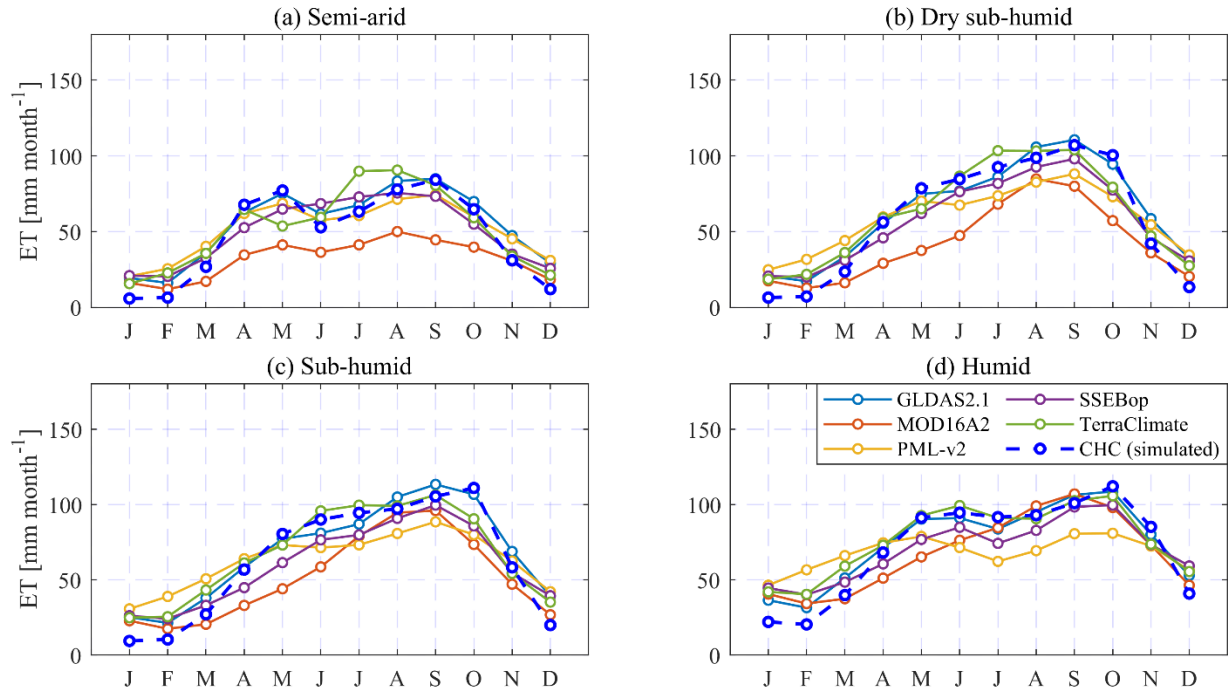

Figure S2: Comparison of area-averaged annual cycles of the simulated and satellite and model-based global actual evapotranspiration (ETA) datasets across the four climatic regimes (see Figure 1c in the main article) for the record period 2003-2010.



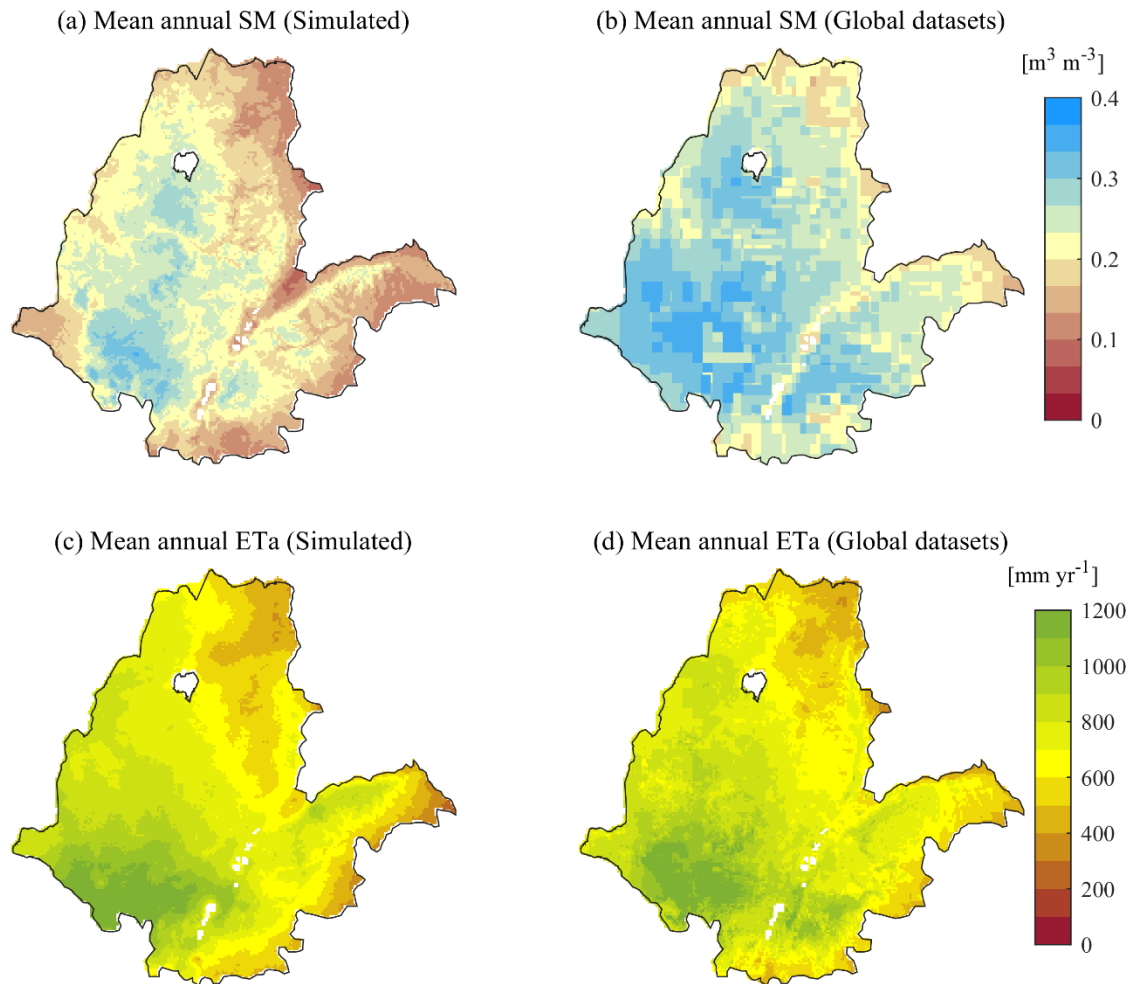

Figure S3: Maps of simulated and global mean annual SM (a and b), and ETa (c and d) for the record period 2003-2010. The mean global SM data mapped here is the median of four SM products (ESA CCI, GLDAS2.1, LPRM-TMI, and SGD-SM). The mean global ETa is the median of five ETa products (GLDAS2.1, MOD16A2, PML-v2, SSEBop, and TerraClimate)

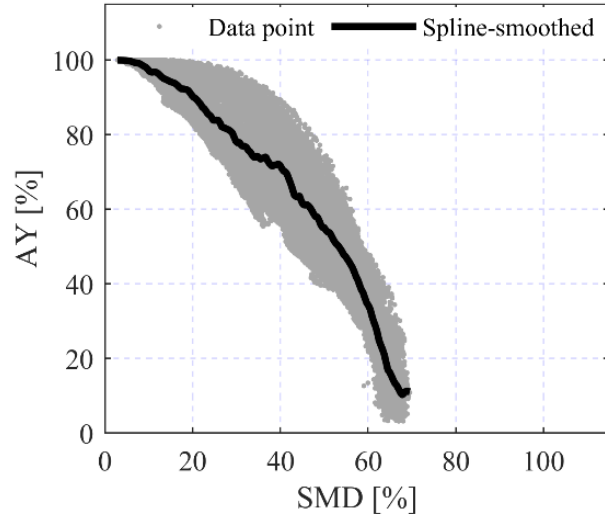

Figure S4: The relationship between AY and SMD in the RFA region of Ethiopia. Each data point represents a single grid cell in the RFA domain considering both Meher and Belg growing seasons.

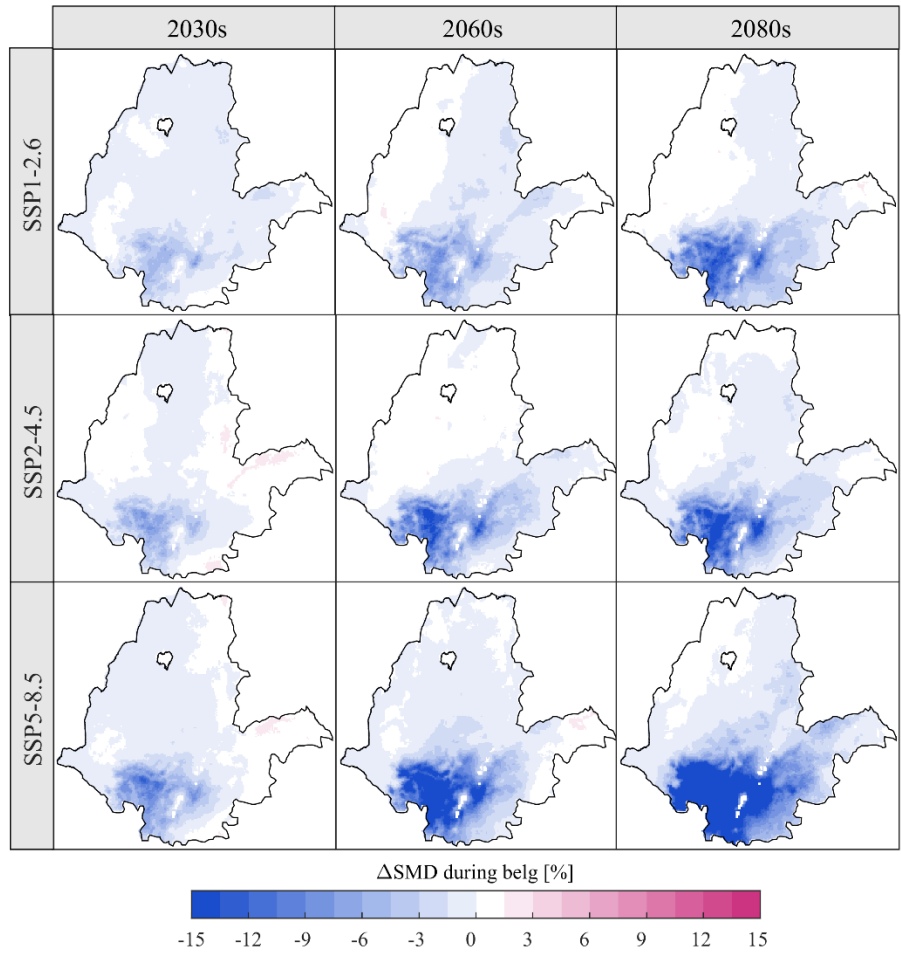

Figure S5: Projected changes in soil moisture deficit (SMD) across the rainfed agricultural region of Ethiopia during the Belg growing season under the SSP1-2.6, SSP2-4.5, and SSP5-8.5 scenarios in the 2030s, 2060s, and 2080s

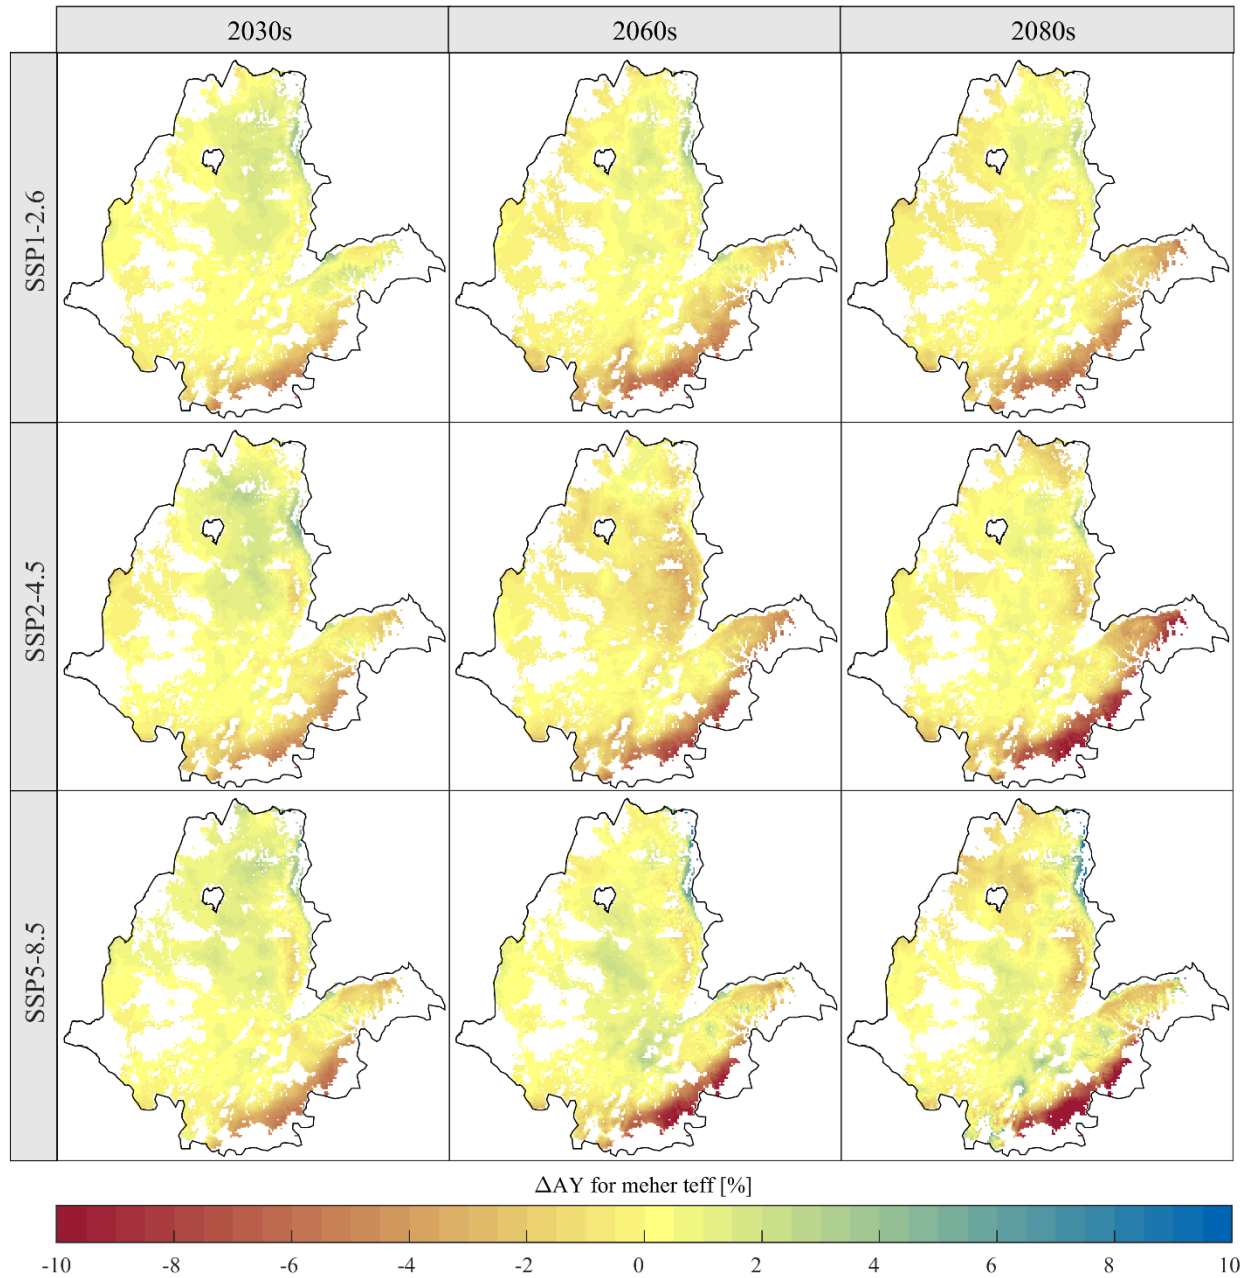

Figure S6: Projected changes in Meher water-limited attainable yield (AY) for teff under the SSP1-2.6, SSP2-4.5, and SSP5-8.5. The RFA region was masked using cropland suitability maps (Wakjira et al., under review) to restrict the analysis to areas potentially suitable for each crop. The non-producing areas during both seasons were also masked out following the Atlas of Ethiopian Rural Socioeconomy (IFPRI and CSA, 2006).

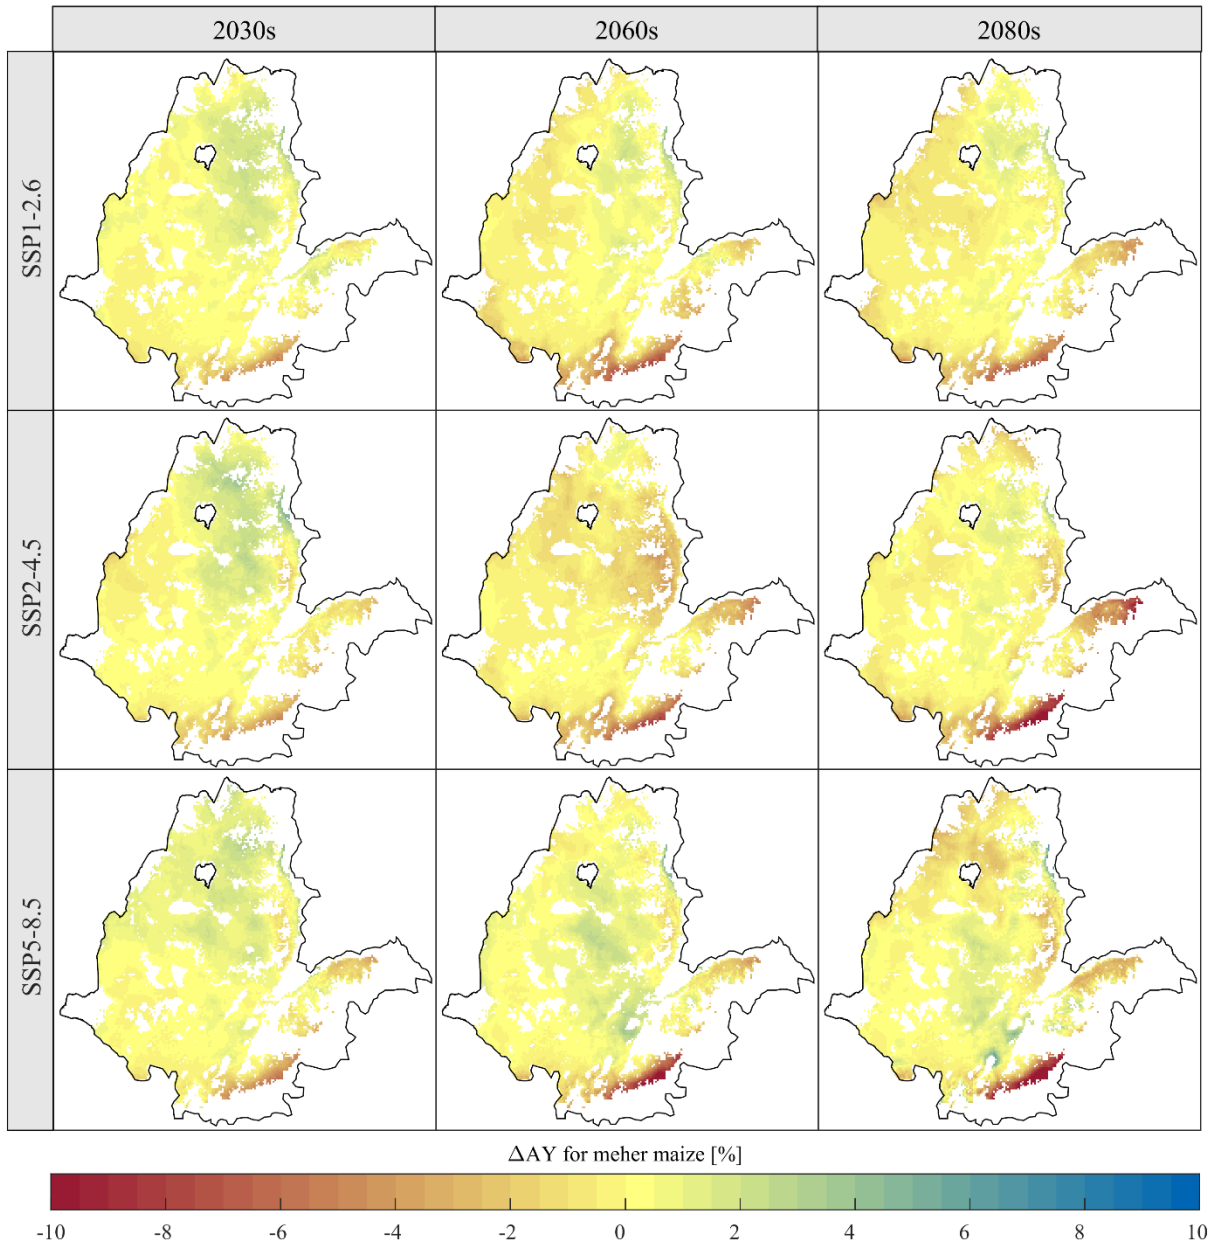

Figure S7: The same as Figure S6, but for maize

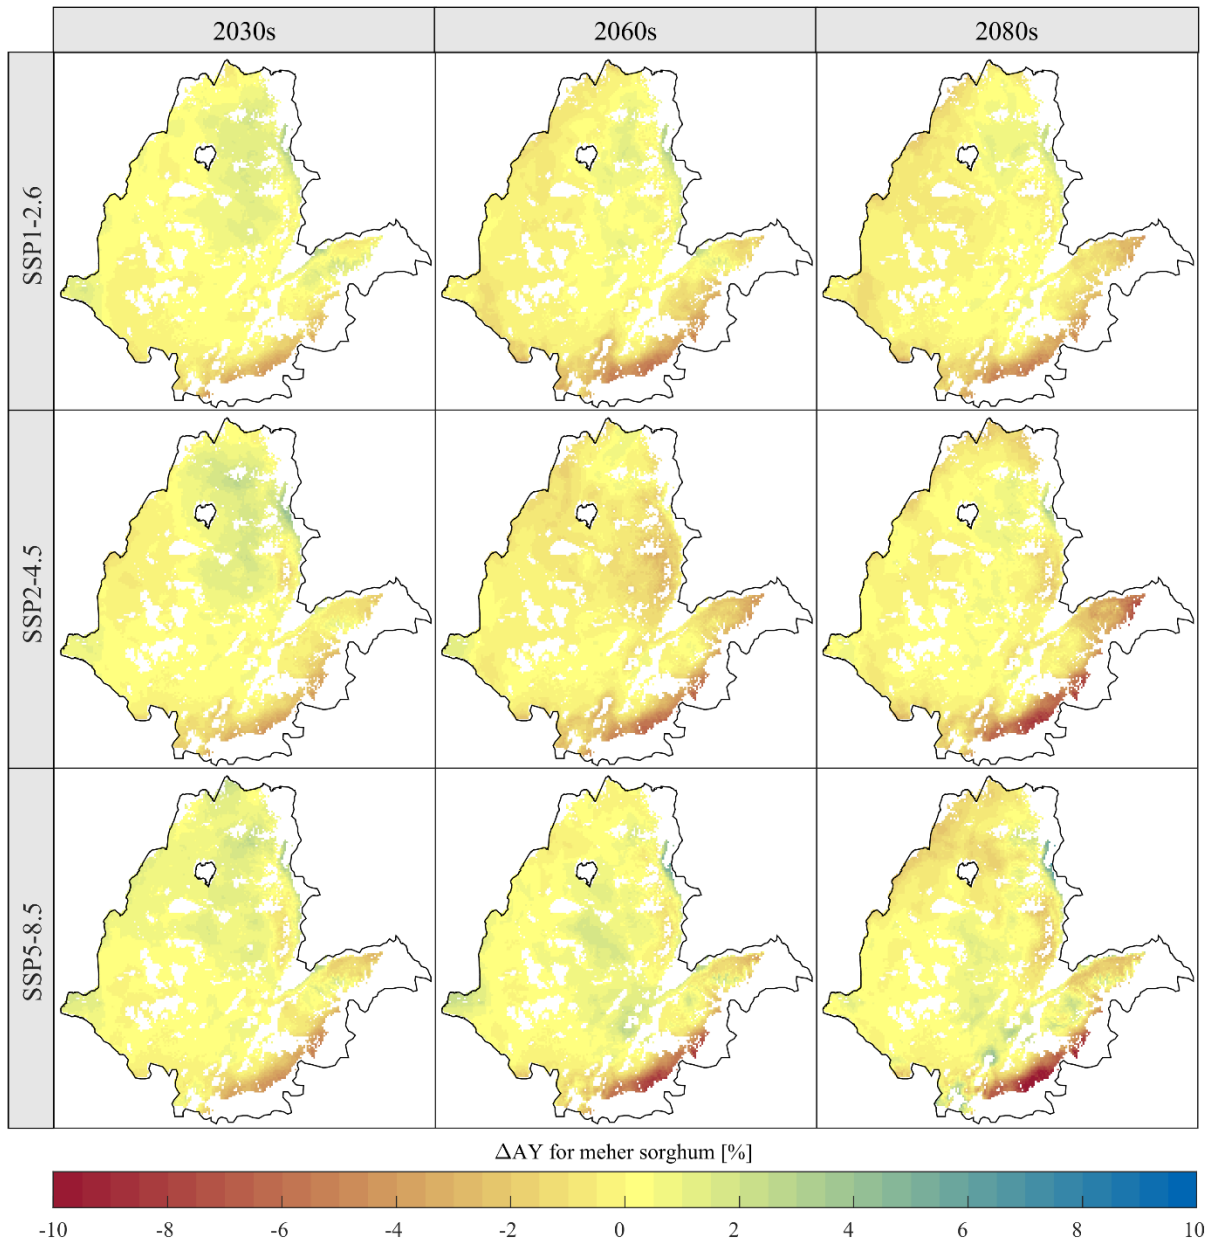

Figure S8: The same as Figure S6, but for sorghum

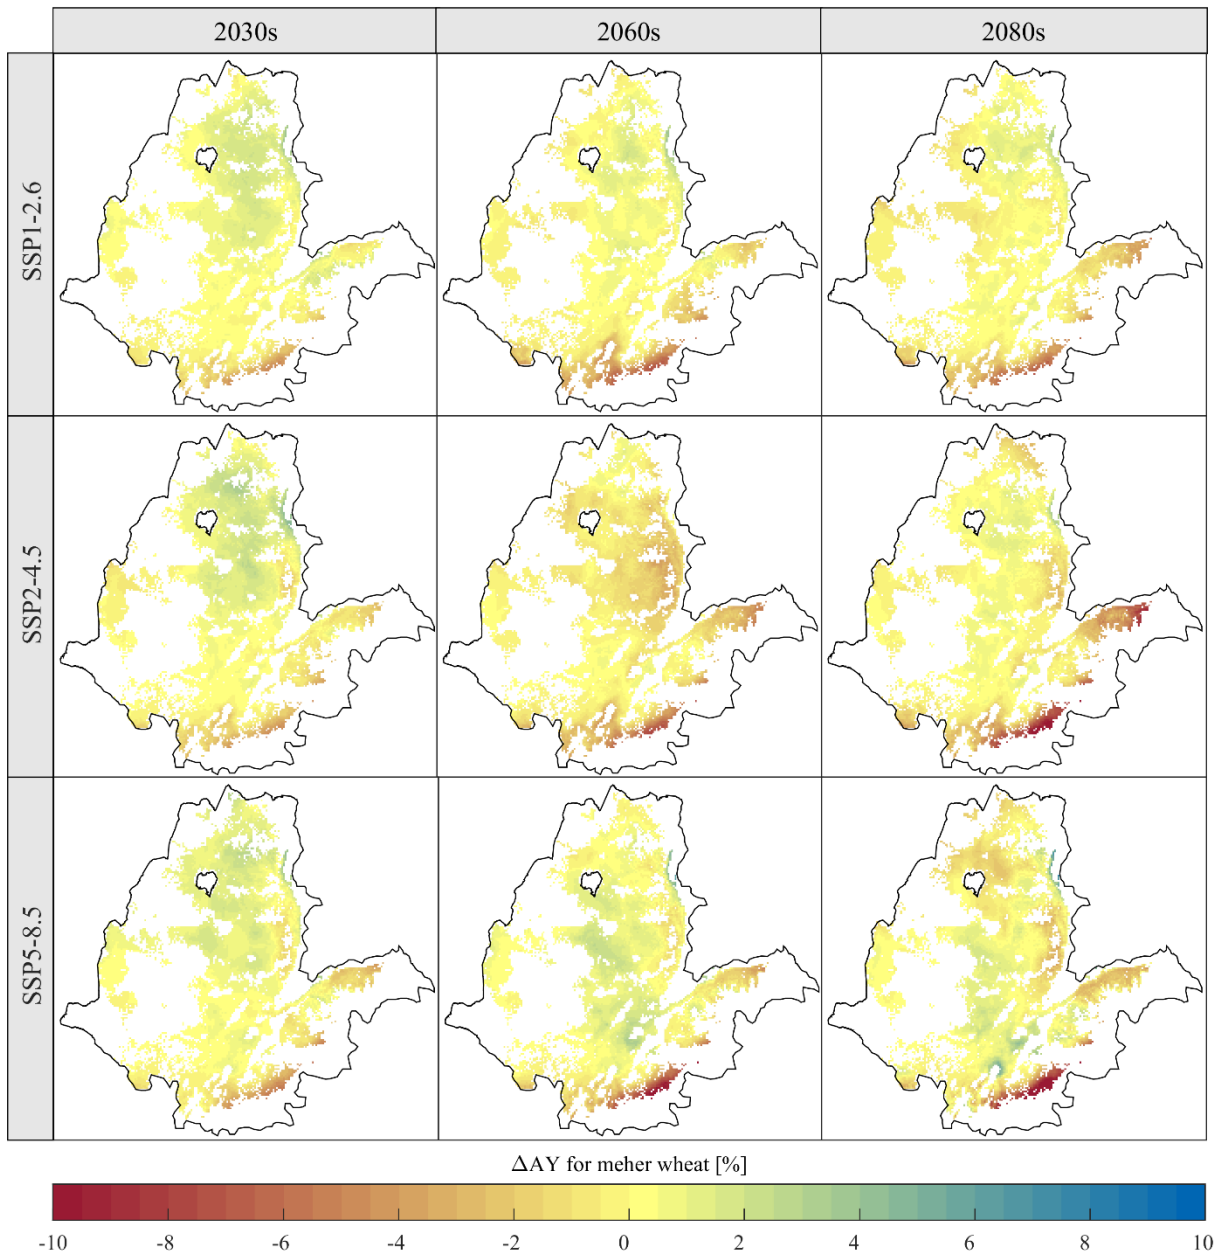

Figure S9: The same as Figure S6, but for wheat



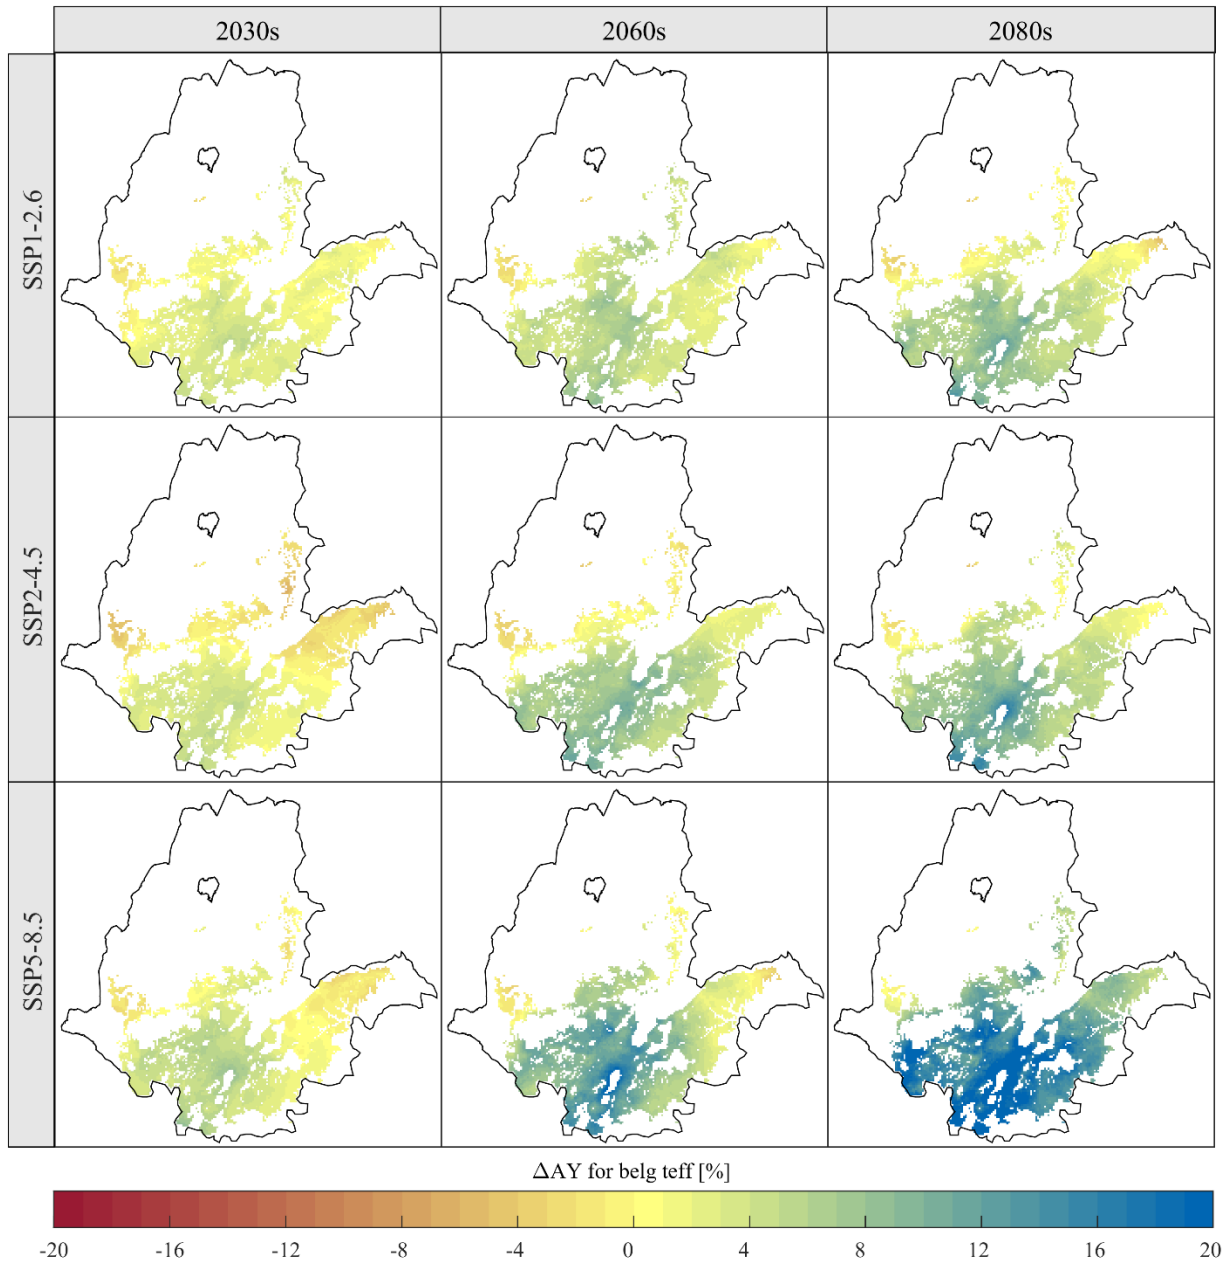

Figure S10: Projected changes in Belg water-limited attainable yield (AY) for teff under the SSP1-2.6, SSP2-4.5, and SSP5-8.5. The RFA region was masked using cropland suitability maps (Wakjira, 2024) to restrict the analysis to areas potentially suitable for each crop. The non-producing areas during both seasons were also masked out following the Atlas of Ethiopian Rural Socioeconomy (IFPRI and CSA, 2006).



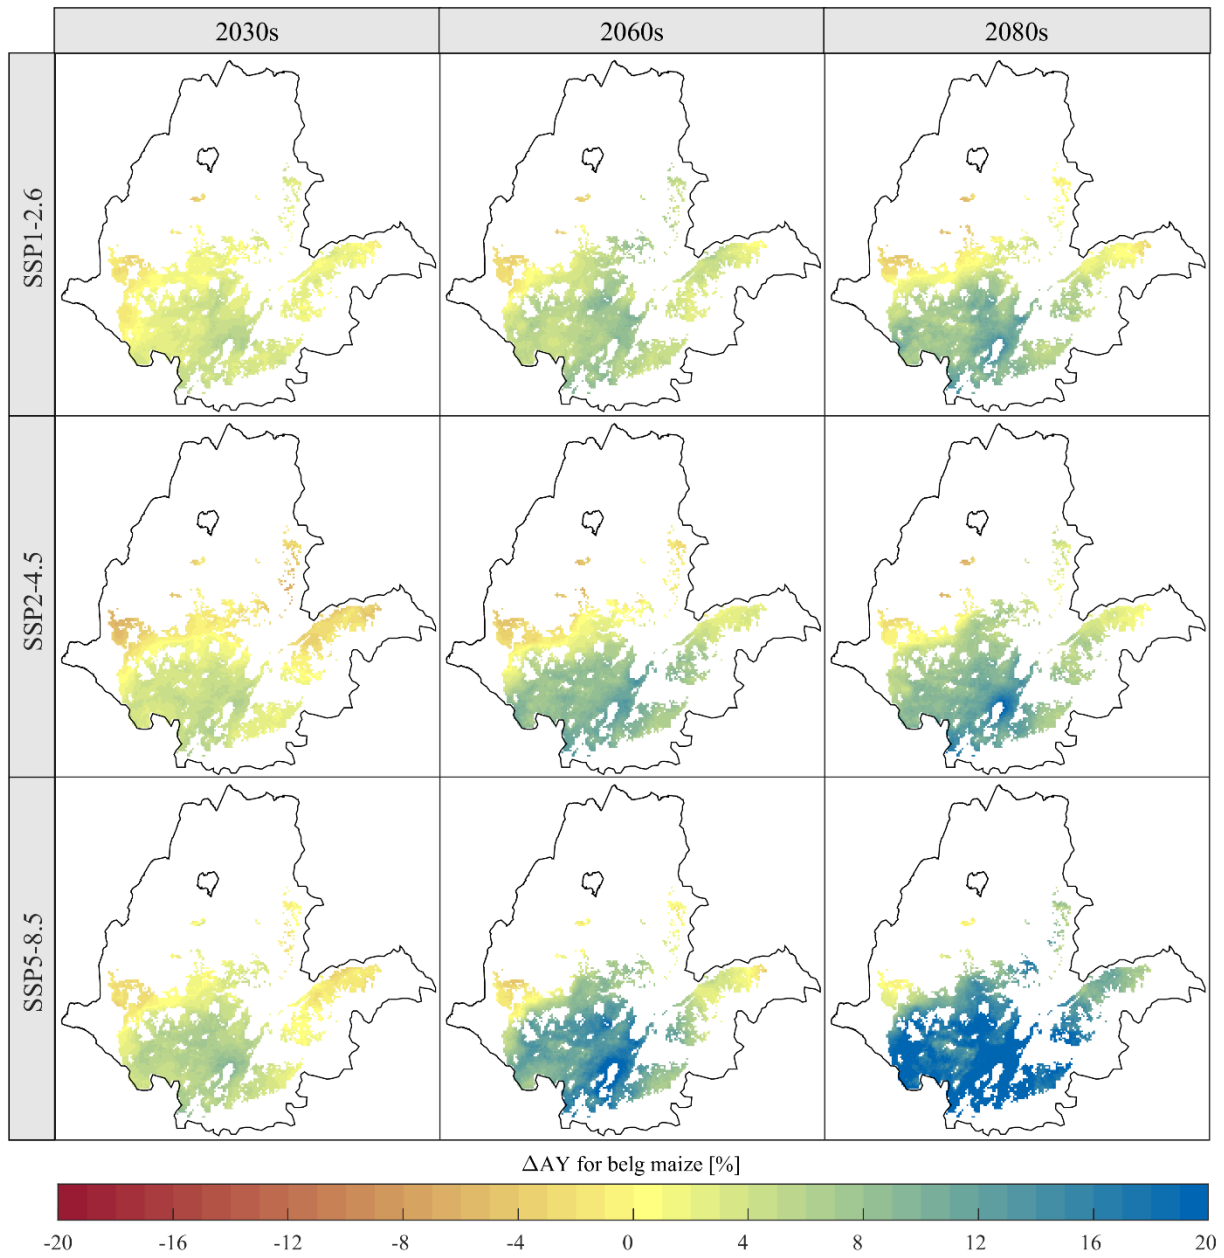

Figure S11: The same as Figure S10, but for maize

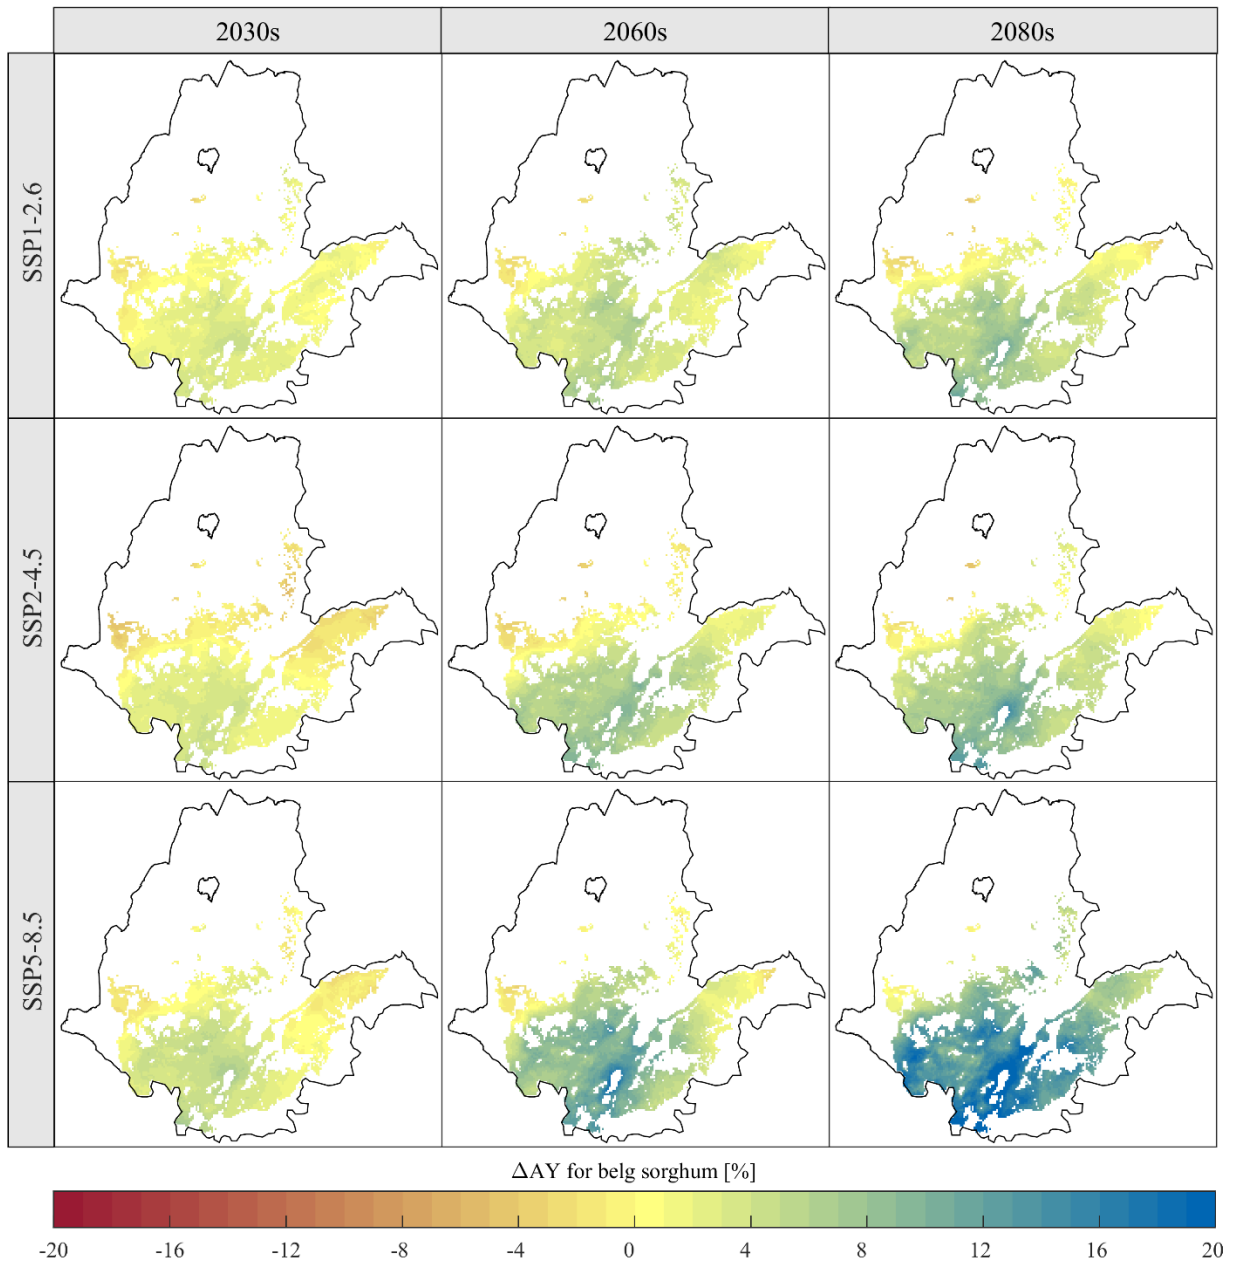

Figure S12: The same as Figure S10, but for sorghum

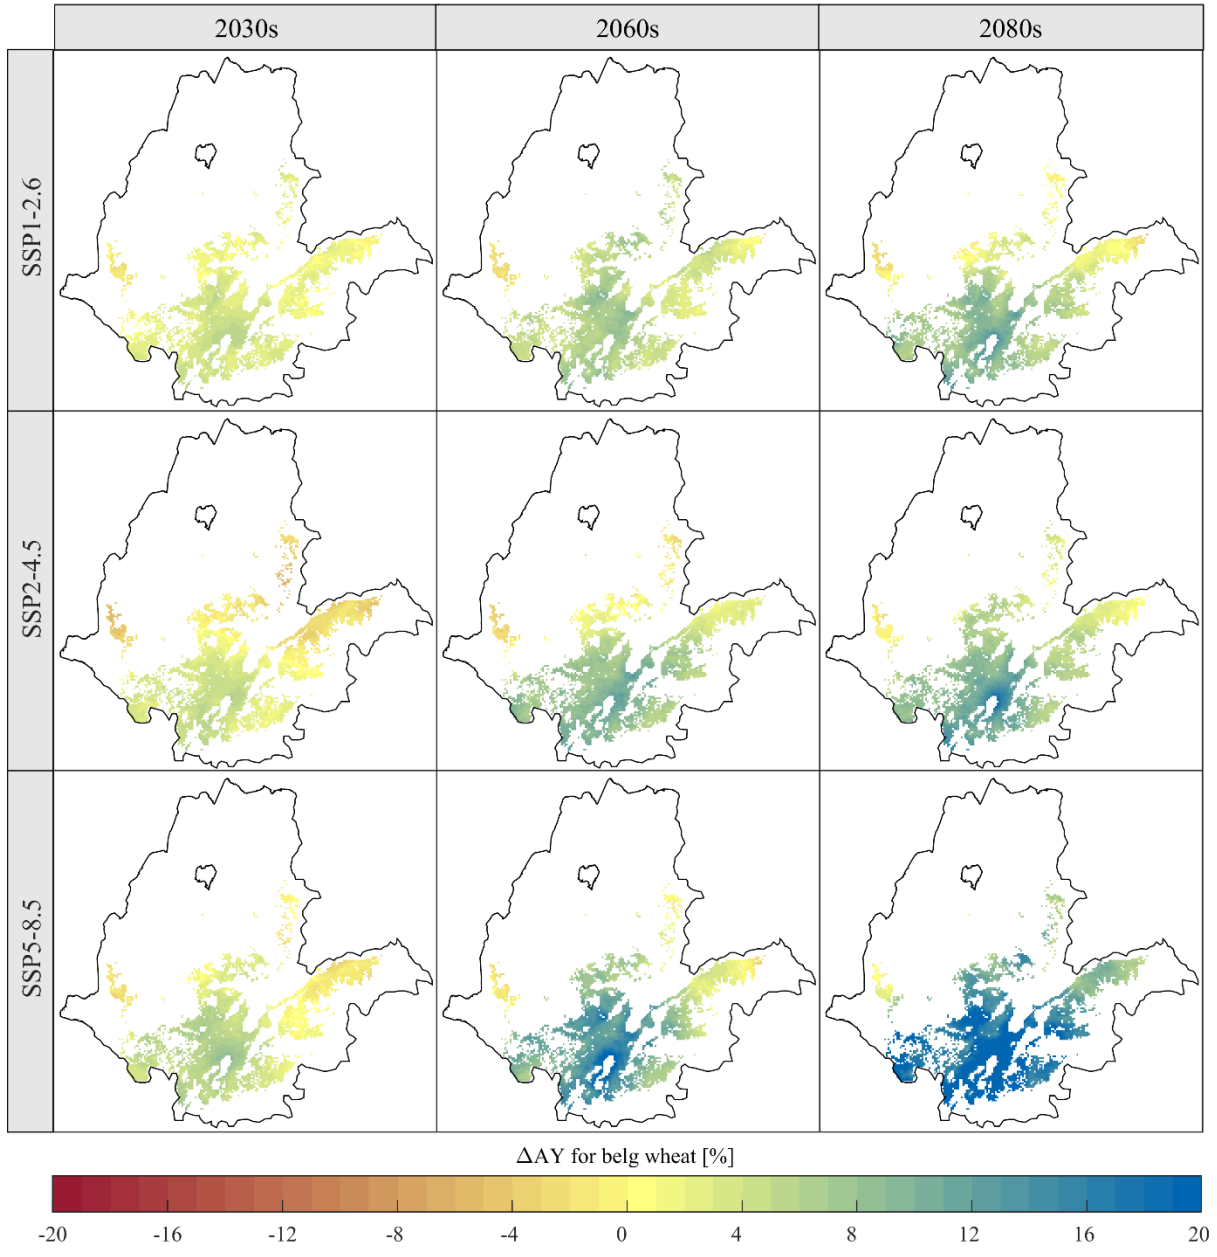

Figure S13: The same as Figure S10, but for wheat

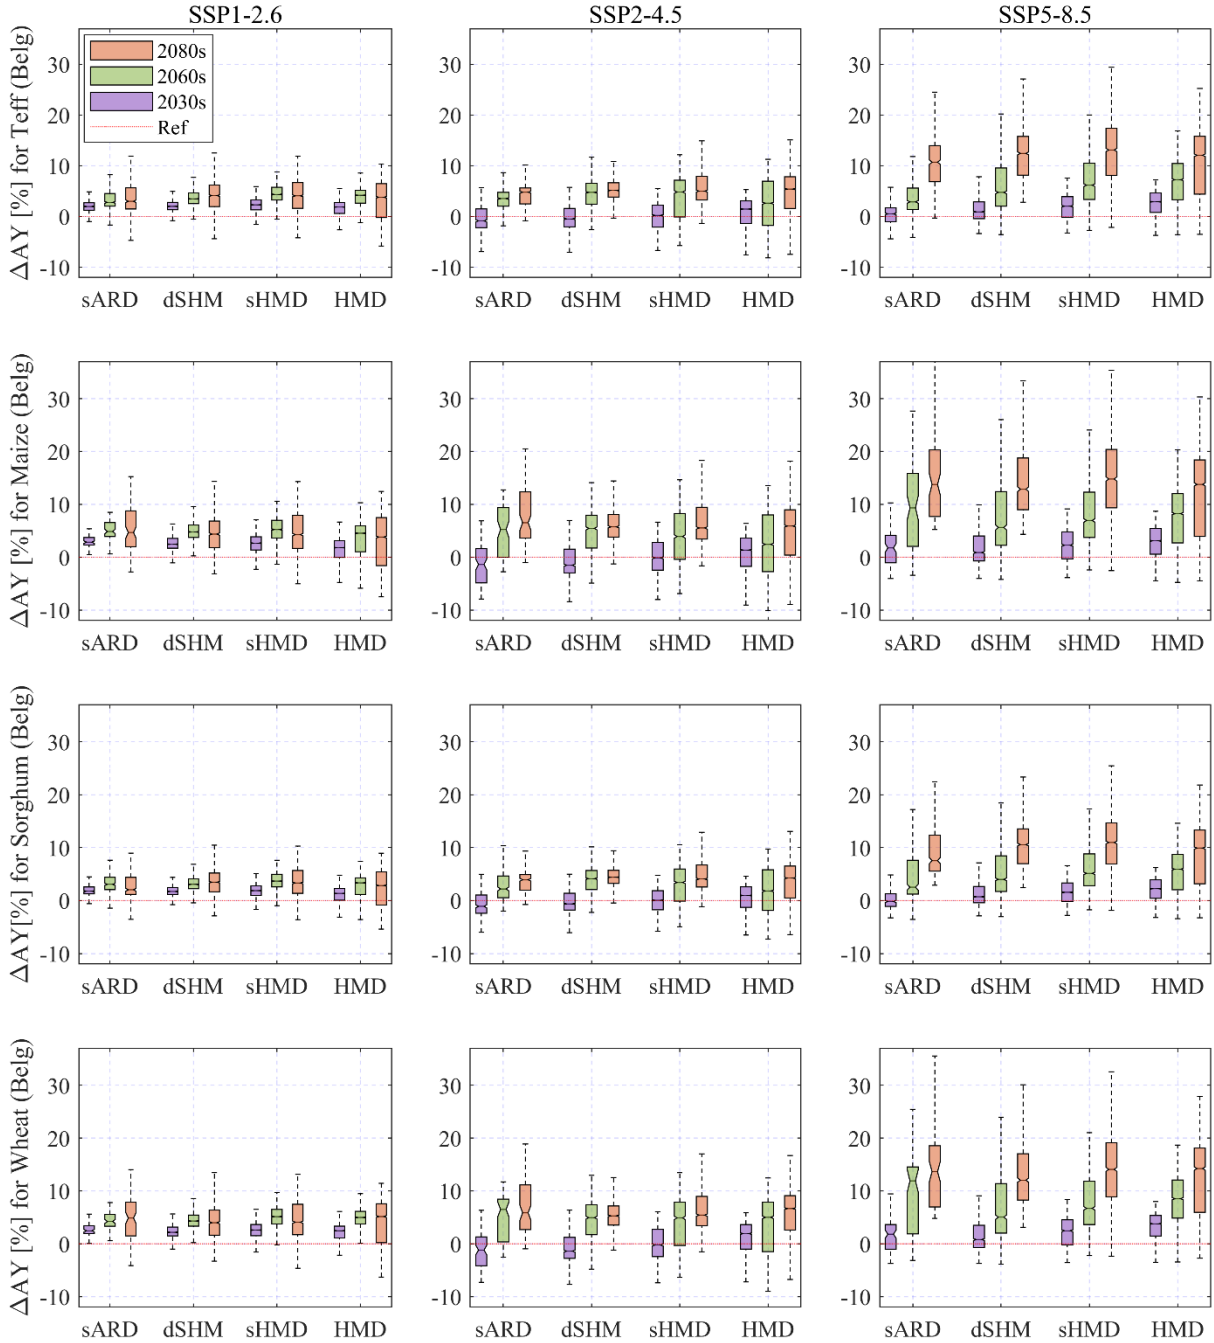

Figure S14: Boxplots of the projected changes in water-limited yields (AY) of the four major cereal crops produced in Ethiopia in different climatic regimes under the three SSPs during the three future periods, during the Belg growing season. Each boxplot represents the distribution of AY changes within Belg-producing areas for all grid cells in the respective climatic regime. Outlier values have been excluded.

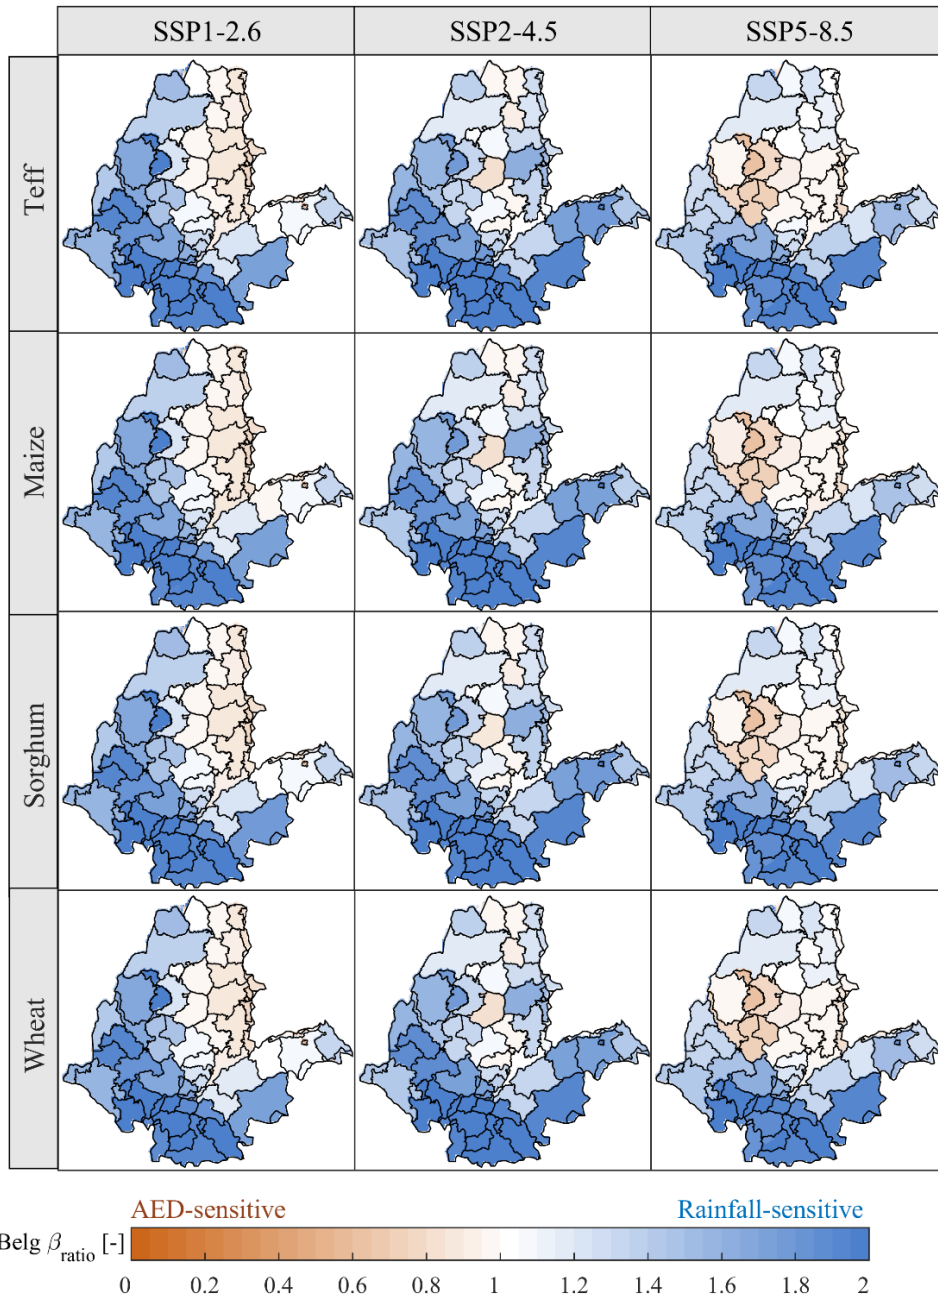

Figure S15: Area-averaged relative sensitivity ( $\beta_{ratio}$ ) of water-limited attainable yields (AY) to rainfall and atmospheric evaporative demand (AED) for the Belg growing season at the administrative zone level under the low, intermediate, and high emission scenarios for teff, maize, sorghum, and wheat. The mapped values represent the average of  $\beta_{ratio}$  of all grid cells within each zone, and all three future periods. The short names of the 62

administrative zones within the RFA region of Ethiopia are indicated in Figure 1. The long names are listed in Table S1 of the supplementary material.

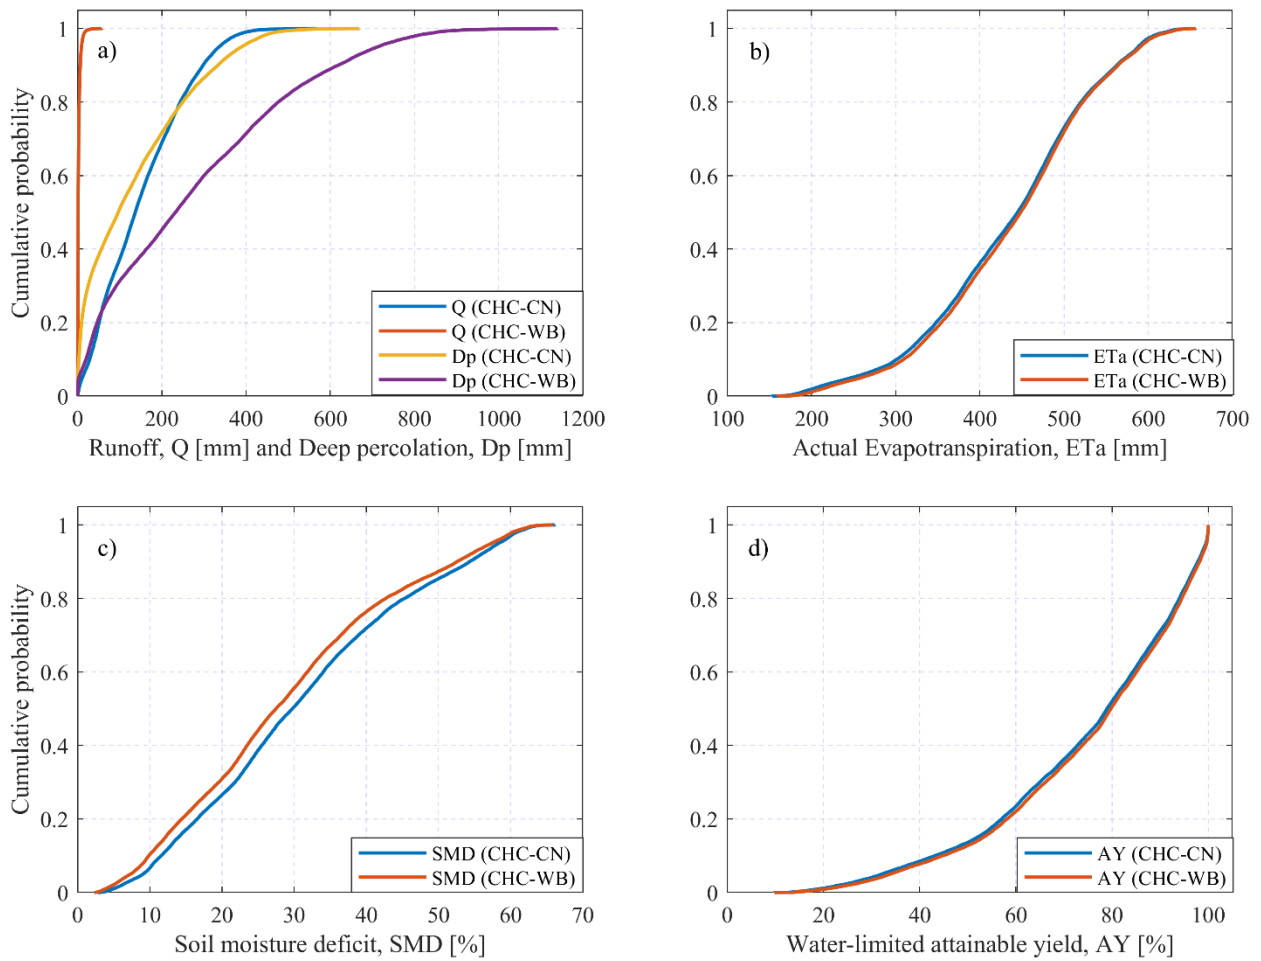

Figure S16: CDF plots of CN-based (CHC-CN) and water balance-based (CHC-WB) agrohydrological simulations for the Meher growing season, showing: a) surface runoff (Q) and deep percolation (Dp), b) actual evapotranspiration (ETa), c) soil moisture deficit (SMD), and d) water-limited attainable yield (AY). The values presented are the climatological means for the reference period (1981–2010) at each grid point across the rainfed agricultural regions of Ethiopia.

## References

Abebe, B. A.: Modeling the Effect of Climate and Land Use Change on the Water Resources in Northern Ethiopia: The Case of Suluh River Basin, 1–168 pp., 2014.

Abiyu, A. and Alamirew, T.: Assessment of stage-wise deficit furrow irrigation application on maize production at

Koga irrigation scheme, Blue Nile River Basin, Ethiopia, *Assessment*, 6, 21–29, 2015.

Adimassu, Z., Mekonnen, K., Yirga, C., and Kessler, A.: Effect of soil bunds on runoff, soil and nutrient losses, and crop yield in the central highlands of Ethiopia, *L. Degrad. Dev.*, 25, 554–564, <https://doi.org/10.1002/ldr.2182>, 2014.

Adimassu, Z., Alemu, G., and Tamene, L.: Effects of tillage and crop residue management on runoff, soil loss and crop yield in the Humid Highlands of Ethiopia, *Agric. Syst.*, 168, 11–18, <https://doi.org/10.1016/j.agsy.2018.10.007>, 2019.

Admasu, R., Tadesse, M., and Shimbir, T.: Effect of Growth Stage Moisture Stress on Maize ( *Zea Mays L.* ) Yield and Water Use Efficiency at West Wellaga , Ethiopia, *J. Biol. Agric. Healthc.*, 7, 98–103, 2017.

Amare, T., Zegeye, A. D., Yitafaru, B., Steenhuis, T. S., Hurni, H., and Zeleke, G.: Combined effect of soil bund with biological soil and water conservation measures in the northwestern Ethiopian highlands, *Ecohydrol. Hydrobiol.*, 14, 192–199, <https://doi.org/10.1016/j.ecohyd.2014.07.002>, 2014.

Andrews, M. B., Ridley, J. K., Wood, R. A., Andrews, T., Blockley, E. W., Booth, B., Burke, E., Dittus, A. J., Florek, P., Gray, L. J., Haddad, S., Hardiman, S. C., Hermanson, L., Hodson, D., Hogan, E., Jones, G. S., Knight, J. R., Kuhlbrodt, T., Misios, S., Mizielinski, M. S., Ringer, M. A., Robson, J., and Sutton, R. T.: Historical Simulations With HadGEM3-GC3.1 for CMIP6, *J. Adv. Model. Earth Syst.*, 12, 1–34, <https://doi.org/10.1029/2019MS001995>, 2020.

Araya, T., Cornelis, W. M., Nyssen, J., Govaerts, B., Bauer, H., Gebreegziabher, T., Oicha, T., Raes, D., Sayre, K. D., Haile, M., and Deckers, J.: Effects of conservation agriculture on runoff, soil loss and crop yield under rainfed conditions in Tigray, Northern Ethiopia, *Soil Use Manag.*, 27, 404–414, <https://doi.org/10.1111/j.1475-2743.2011.00347.x>, 2011.

Astatke, A., Airaksinen, H., and Saleem, M. A. M.: Supplementary irrigation for sequential cropping in the Ethiopian highland vertisols using broadbed and furrow land management system, *Agric. Water Manag.*, 20, 173–184, [https://doi.org/10.1016/0378-3774\(91\)90015-B](https://doi.org/10.1016/0378-3774(91)90015-B), 1991.

Bao, Y., Song, Z., and Qiao, F.: FIO-ESM Version 2.0: Model Description and Evaluation, *J. Geophys. Res. Ocean.*, 125, 1–21, <https://doi.org/10.1029/2019JC016036>, 2020.

Bi, D., Dix, M., Marsland, S., O’farrell, S., Sullivan, A., Bodman, R., Law, R., Harman, I., Srbinovsky, J., Rashid, H. A., Dobrohotoff, P., Mackallah, C., Yan, H., Hirst, A., Savita, A., Dias, F. B., Woodhouse, M., Fiedler, R., and Heerdegen, A.: Configuration and spin-up of ACCESS-CM2, the new generation Australian Community Climate and Earth System Simulator Coupled Model, *J. South. Hemisph. Earth Syst. Sci.*, 70, 225–251, <https://doi.org/10.1071/ES19040>, 2020.

Boucher, O., Servonnat, J., Albright, A. L., Aumont, O., Balkanski, Y., Bastrikov, V., Bekki, S., Bonnet, R., Bony, S., Bopp, L., Braconnot, P., Brockmann, P., Cadule, P., Caubel, A., Cheruy, F., Codron, F., Cozic, A., Cugnet, D., D’Andrea, F., Davini, P., de Lavergne, C., Denvil, S., Deshayes, J., Devilliers, M., Ducharne, A., Dufresne, J. L.,

Dupont, E., Éthé, C., Fairhead, L., Falletti, L., Flavoni, S., Foujols, M. A., Gardoll, S., Gastineau, G., Ghattas, J., Grandpeix, J. Y., Guenet, B., Guez, L. E., Guilyardi, E., Guimberteau, M., Hauglustaine, D., Hourdin, F., Idelkadi, A., Joussaume, S., Kageyama, M., Khodri, M., Krinner, G., Lebas, N., Levvasseur, G., Lévy, C., Li, L., Lott, F., Lurton, T., Luysaert, S., Madec, G., Madeleine, J. B., Maignan, F., Marchand, M., Marti, O., Mellul, L., Meurdesoif, Y., Mignot, J., Musat, I., Ottlé, C., Peylin, P., Planton, Y., Polcher, J., Rio, C., Rochetin, N., Rousset, C., Sepulchre, P., Sima, A., Swingedouw, D., Thiéblemont, R., Traore, A. K., Vancoppenolle, M., Vial, J., Vialard, J., Viovy, N., and Vuichard, N.: Presentation and Evaluation of the IPSL-CM6A-LR Climate Model, *J. Adv. Model. Earth Syst.*, 12, 1–52, <https://doi.org/10.1029/2019MS002010>, 2020.

Cao, J., Wang, B., Yang, Y. M., Ma, L., Li, J., Sun, B., Bao, Y., He, J., Zhou, X., and Wu, L.: The NUIST Earth System Model (NESM) version 3: Description and preliminary evaluation, *Geosci. Model Dev.*, 11, 2975–2993, <https://doi.org/10.5194/gmd-11-2975-2018>, 2018.

Cherchi, A., Fogli, P. G., Lovato, T., Peano, D., Iovino, D., Gualdi, S., Masina, S., Scoccimarro, E., Materia, S., Bellucci, A., and Navarra, A.: Global Mean Climate and Main Patterns of Variability in the CMCC-CM2 Coupled Model, *J. Adv. Model. Earth Syst.*, 11, 185–209, <https://doi.org/10.1029/2018MS001369>, 2019.

Chinasho, A., Bedadi, B., Lemma, T., Tana, T., Hordofa, T., and Elias, B.: Response of maize to irrigation and blended fertilizer levels for climate smart food production in Wolaita Zone, southern Ethiopia, *J. Agric. Food Res.*, 12, 100551, <https://doi.org/10.1016/j.jafr.2023.100551>, 2023.

Christian, J. R., Denman, K. L., Hayashida, H., Holdsworth, A. M., Lee, W. G., Riche, O. G. J., Shao, A. E., Steiner, N., and Swart, N. C.: Ocean biogeochemistry in the Canadian Earth System Model version 5.0.3: CanESM5 and CanESM5-CanOE, *Geosci. Model Dev.*, 15, 4393–4424, <https://doi.org/10.5194/gmd-15-4393-2022>, 2022.

Collick, A. S., Easton, Z. M., Ashagrie, T., Biruk, B., Tilahun, S., Adgo, E., Awulachew, S. B., Zeleke, G., and Steenhuis, T. S.: A simple semi-distributed water balance model for the Ethiopian highlands, *Hydrol. Process.*, 23, 3718–3727, <https://doi.org/10.1002/hyp.7517>, 2009.

Danabasoglu, G., Lamarque, J. F., Bacmeister, J., Bailey, D. A., DuVivier, A. K., Edwards, J., Emmons, L. K., Fasullo, J., Garcia, R., Gettelman, A., Hannay, C., Holland, M. M., Large, W. G., Lauritzen, P. H., Lawrence, D. M., Lenaerts, J. T. M., Lindsay, K., Lipscomb, W. H., Mills, M. J., Neale, R., Oleson, K. W., Otto-Bliesner, B., Phillips, A. S., Sacks, W., Tilmes, S., van Kampenhout, L., Vertenstein, M., Bertini, A., Dennis, J., Deser, C., Fischer, C., Fox-Kemper, B., Kay, J. E., Kinnison, D., Kushner, P. J., Larson, V. E., Long, M. C., Mickelson, S., Moore, J. K., Nienhouse, E., Polvani, L., Rasch, P. J., and Strand, W. G.: The Community Earth System Model Version 2 (CESM2), *J. Adv. Model. Earth Syst.*, 12, 1–35, <https://doi.org/10.1029/2019MS001916>, 2020.

David A., R., J., S., Ravi S., N., and Parthasarathi, M.: Current Trends in the Representation of Physical Processes in Weather and Climate Models, 377 pp., 2019.

Descheemaeker, K., Nyssen, J., Poesen, J., Raes, D., Haile, M., Muys, B., and Deckers, S.: Runoff on slopes with restoring vegetation: A case study from the Tigray highlands, Ethiopia, *J. Hydrol.*, 331, 219–241,



<https://doi.org/10.1016/j.jhydrol.2006.05.015>, 2006.

Dinsa, G. F. and Bogale, M.: Potential yield and gap analysis (PYGA) of wheat in Ethiopia., *agriRxiv*, <https://doi.org/10.31220/agriRxiv.2023.00218>, 2023.

Döscher, R., Acosta, M., Alessandri, A., Anthoni, P., Arsouze, T., Bergman, T., Bernardello, R., Boussetta, S., Caron, L. P., Carver, G., Castrillo, M., Catalano, F., Cvijanovic, I., Davini, P., Dekker, E., Doblas-Reyes, F. J., Docquier, D., Echevarria, P., Fladrich, U., Fuentes-Franco, R., Gröger, M., Hardenberg, J. V., Hieronymus, J., Karami, M. P., Keskinen, J. P., Koenigk, T., Makkonen, R., Massonnet, F., Ménégoz, M., Miller, P. A., Moreno-Chamarro, E., Nieradzki, L., Van Noije, T., Nolan, P., O'donnell, D., Ollinaho, P., Van Den Oord, G., Ortega, P., Prims, O. T., Ramos, A., Reerink, T., Rousset, C., Ruprich-Robert, Y., Le Sager, P., Schmith, T., Schrödner, R., Serva, F., Sicardi, V., Sloth Madsen, M., Smith, B., Tian, T., Tourigny, E., Uotila, P., Vancoppenolle, M., Wang, S., Wårlind, D., Willén, U., Wyser, K., Yang, S., Yepes-Arbós, X., and Zhang, Q.: The EC-Earth3 Earth system model for the Coupled Model Intercomparison Project 6, *Geosci. Model Dev.*, 15, 2973–3020, <https://doi.org/10.5194/gmd-15-2973-2022>, 2022.

Dunne, J. P., Horowitz, L. W., Adcroft, A. J., Ginoux, P., Held, I. M., John, J. G., Krasting, J. P., Malyshev, S., Naik, V., Paulot, F., Shevliakova, E., Stock, C. A., Zadeh, N., Balaji, V., Blanton, C., Dunne, K. A., Dupuis, C., Durachta, J., Dussin, R., Gauthier, P. P. G., Griffies, S. M., Guo, H., Hallberg, R. W., Harrison, M., He, J., Hurlin, W., McHugh, C., Menzel, R., Milly, P. C. D., Nikonov, S., Paynter, D. J., Ploshay, J., Radhakrishnan, A., Rand, K., Reichl, B. G., Robinson, T., Schwarzkopf, D. M., Sentman, L. T., Underwood, S., Vahlenkamp, H., Winton, M., Wittenberg, A. T., Wyman, B., Zeng, Y., and Zhao, M.: The GFDL Earth System Model Version 4.1 (GFDL-ESM 4.1): Overall Coupled Model Description and Simulation Characteristics, *J. Adv. Model. Earth Syst.*, 12, 1–56, <https://doi.org/10.1029/2019MS002015>, 2020.

Erkossa, T., Stahr, K., and Gaiser, T.: Effect of different methods of land preparation on runoff, soil and nutrient losses from a Vertisol in the Ethiopian highlands, *Soil Use Manag.*, 21, 253–259, <https://doi.org/10.1111/j.1475-2743.2005.tb00132.x>, 2006.

Furgassa, Z. S.: Zelalem Shelemew Furgassa. The Effect of Deficit Irrigation on Maize Crop Under Conventional Furrow Irrigation in Adami Tulu Central Rift Valley of Ethiopia, *Appl. Eng.*, 1, 1–12, <https://doi.org/10.11648/j.ae.20170101.11>, 2017.

Gebreigziabher, E. T.: Effect of Deficit Irrigation on Yield and Water Use Efficiency of Maize at Selekleka District, Ethiopia, *J. Nepal Agric. Res. Council.*, 6, 127–135, <https://doi.org/10.3126/jnarc.v6i0.28124>, 2020.

Girmay, A. B.: Response of Wheat (*Triticum Aestivum* L) to Supplementary Irrigation and N-P Fertilizers in Mekelle, Northern Ethiopia, <https://doi.org/10.4172/2229-4473.1000380>, 2017.

Gutjahr, O., Putrasahan, D., Lohmann, K., Jungclaus, J. H., Von Storch, J. S., Brüggemann, N., Haak, H., and Stössel, A.: Max Planck Institute Earth System Model (MPI-ESM1.2) for the High-Resolution Model Intercomparison Project (HighResMIP), *Geosci. Model Dev.*, 12, 3241–3281, <https://doi.org/10.5194/gmd-12-3241-2019>, 2019.

- Hajima, T., Watanabe, M., Yamamoto, A., Tatebe, H., Noguchi, M. A., Abe, M., Ohgaito, R., Ito, A., Yamazaki, D., Okajima, H., Ito, A., Takata, K., Ogochi, K., Watanabe, S., and Kawamiya, M.: Development of the MIROC-ES2L Earth system model and the evaluation of biogeochemical processes and feedbacks, *Geosci. Model Dev.*, 13, 2197–2244, <https://doi.org/10.5194/gmd-13-2197-2020>, 2020.
- Herweg, K. and Ludi, E.: The performance of selected soil and water conservation measures - Case studies from Ethiopia and Eritrea, *Catena*, 36, 99–114, [https://doi.org/10.1016/S0341-8162\(99\)00004-1](https://doi.org/10.1016/S0341-8162(99)00004-1), 1999.
- Herweg, K. and Stillhardt, B.: The variability of soil erosion in the highlands of Ethiopia and Eritrea: Average and extreme erosion patterns, Bern, Switzerland, 81 pp., 1999.
- IFPRI and CSA: Atlas of the Ethiopian Rural Economy, International Food Policy Research Institute, Washinton DC, <https://doi.org/10.2499/0896291545>, 2006.
- IPCC: Annex II: Models [Gutiérrez, J. M., A.-M. Tréguier (eds.)], 2087–2138 pp., <https://doi.org/10.1017/9781009157896.016.2087>, 2021.
- Jemal, K. and Berhanu, S.: Effect of Water Application Methods in Furrow Irrigation Along with Different Types of Mulches on Yield and Water Productivity of Maize (*Zea mays* l.) at Hawassa, Ethiopia, *J. Nat. Sci. Res.*, 10, 1–14, <https://doi.org/10.7176/jnsr/10-5-01>, 2020.
- Kassie, B. T., Van Ittersum, M. K., Hengsdijk, H., Asseng, S., Wolf, J., and Rötter, R. P.: Climate-induced yield variability and yield gaps of maize (*Zea mays* L.) in the Central Rift Valley of Ethiopia, *F. Crop. Res.*, 160, 41–53, <https://doi.org/10.1016/j.fcr.2014.02.010>, 2014.
- Kemal, Y. O., Damot, G. A., and Zewdie, D. A.: Effects of supplemental irrigation on yield and yield attributes of chickpea (*Cicer arietinum* L.) in western Ethiopia, *Ethiop. J. Sci. Technol.*, 11, 97, <https://doi.org/10.4314/ejst.v11i2.2>, 2019.
- Li, L., Yu, Y., Tang, Y., Lin, P., Xie, J., Song, M., Dong, L., Zhou, T., Liu, L., Wang, L., Pu, Y., Chen, X., Chen, L., Xie, Z., Liu, H., Zhang, L., Huang, X., Feng, T., Zheng, W., Xia, K., Liu, H., Liu, J., Wang, Y., Wang, L., Jia, B., Xie, F., Wang, B., Zhao, S., Yu, Z., Zhao, B., and Wei, J.: The Flexible Global Ocean-Atmosphere-Land System Model Grid-Point Version 3 (FGOALS-g3): Description and Evaluation, *J. Adv. Model. Earth Syst.*, 12, 1–28, <https://doi.org/10.1029/2019MS002012>, 2020.
- Lin, Y., Huang, X., Liang, Y., Qin, Y., Xu, S., Huang, W., Xu, F., Liu, L., Wang, Y., Peng, Y., Wang, L., Xue, W., Fu, H., Zhang, G. J., Wang, B., Li, R., Zhang, C., Lu, H., Yang, K., Luo, Y., Bai, Y., Song, Z., Wang, M., Zhao, W., Zhang, F., Xu, J., Zhao, X., Lu, C., Chen, Y., Luo, Y., Hu, Y., Tang, Q., Chen, D., Yang, G., and Gong, P.: Community Integrated Earth System Model (CIESM): Description and Evaluation, *J. Adv. Model. Earth Syst.*, 12, 1–29, <https://doi.org/10.1029/2019MS002036>, 2020.
- Lovato, T., Peano, D., Butenschön, M., Materia, S., Iovino, D., Scoccimarro, E., Fogli, P. G., Cherchi, A., Bellucci, A., Gualdi, S., Masina, S., and Navarra, A.: CMIP6 Simulations With the CMCC Earth System Model (CMCC-

ESM2), *J. Adv. Model. Earth Syst.*, 14, <https://doi.org/10.1029/2021MS002814>, 2022.

Mebrahtu, Y. and Mehamed, A.: Effect of Different Type of Mulching and Furrow Irrigation Methods on Maize (*Zea mays* L.) Yield and Water Productivity at Raya Valley, Northern Ethiopia, *J. Biol. Agric. Healthc.*, 6–13, <https://doi.org/10.7176/jbah/9-20-02>, 2019.

Mehari, H., Bedadi, B., and Abegaz, F.: Maximizing Water Productivity of Maize using Alternate Furrow Irrigation at Clay-loam Soil, Raya valley, Ethiopia, *Int. J. Plant Breed. Crop Sci.*, 7, 771–778, 2020.

Mekonnen, A., Getnet, M., Nebiyu, A., and Abebe, A. T.: Quantifying Potential Yield and Yield Gaps of Soybean Using CROPGRO-Soybean Model in the Humid Tropics of Southwestern Ethiopia, *Int. J. Plant Prod.*, 16, 653–667, <https://doi.org/10.1007/s42106-022-00218-z>, 2022.

Mengiste, Y. and Tilahun, K.: Yield and water use efficiency of deficit-irrigated maize in semi-arid region of Ethiopia, *African J. Food, Agric. Nutr. Dev.*, 9, 1635–1651, <https://doi.org/10.4314/ajfand.v9i8.48403>, 2009.

Meskelu, E., Tesfaye, H., Debebe, A., and Mohammed, M.: Integrated Effect of Mulching and Furrow Methods on Maize Yield and Water Productivity at Koka, Ethiopia, *Irrig. Drain. Syst. Eng.*, 07, 1–7, <https://doi.org/10.4172/2168-9768.1000207>, 2018.

Mintesinot, B., Verplancke, H., Van Ranst, E., and Mitiku, H.: Examining traditional irrigation methods, irrigation scheduling and alternate furrows irrigation on vertisols in northern Ethiopia, *Agric. Water Manag.*, 64, 17–27, [https://doi.org/10.1016/S0378-3774\(03\)00194-X](https://doi.org/10.1016/S0378-3774(03)00194-X), 2004.

Molla, T., Tesfaye, K., Mekbib, F., Tana, T., and Tadesse, T.: Supplementary irrigation for managing the impact of terminal dry spells on the productivity of rainfed rice (*Oryza sativa* L.) in Fogera Plain, Ethiopia, *Heliyon*, 7, e06703, <https://doi.org/10.1016/j.heliyon.2021.e06703>, 2021.

Mulugeta, W., Nebiyu, A., Kindie Tesfaye, Mezegebu Getnet, Seid Ahmed, and Fasil Mequanint: Quantifying Yield Potential and Yield Gaps of Faba Bean in Ethiopia, *Ethiop. J. Agric. Sci.*, 29, 107–122, 2019.

Muluneh, A., Stroosnijder, L., Keesstra, S., and Biazin, B.: Adapting to climate change for food security in the Rift Valley dry lands of Ethiopia: Supplemental irrigation, plant density and sowing date, *J. Agric. Sci.*, 155, 703–724, <https://doi.org/10.1017/S0021859616000897>, 2017.

Seid, Mulugeta M; Narayanan, K.: Effect of Deficit Irrigation on Maize under Conventional, Fixed and Alternate Furrow Irrigation Systems at Melkassa, Ethiopia, *Int. J. Eng. Res.*, V4, 119–126, <https://doi.org/10.17577/ijertv4is110178>, 2015.

Seland, Ø., Bentsen, M., Olivié, D., Toniazzo, T., Gjermundsen, A., Graff, L. S., Debernard, J. B., Gupta, A. K., He, Y. C., Kirkevåg, A., Schwinger, J., Tjiputra, J., Schanke Aas, K., Bethke, I., Fan, Y., Griesfeller, J., Grini, A., Guo, C., Ilicak, M., Karset, I. H. H., Landgren, O., Liakka, J., Moseid, K. O., Nummelin, A., Spensberger, C., Tang, H., Zhang, Z., Heinze, C., Iversen, T., and Schulz, M.: Overview of the Norwegian Earth System Model (NorESM2) and key climate response of CMIP6 DECK, historical, and scenario simulations, 6165–6200 pp.,

<https://doi.org/10.5194/gmd-13-6165-2020>, 2020.

Sellar, A. A., Jones, C. G., Mulcahy, J. P., Tang, Y., Yool, A., Wiltshire, A., O'Connor, F. M., Stringer, M., Hill, R., Palmieri, J., Woodward, S., de Mora, L., Kuhlbrodt, T., Rumbold, S. T., Kelley, D. I., Ellis, R., Johnson, C. E., Walton, J., Abraham, N. L., Andrews, M. B., Andrews, T., Archibald, A. T., Berthou, S., Burke, E., Blockley, E., Carslaw, K., Dalvi, M., Edwards, J., Folberth, G. A., Gedney, N., Griffiths, P. T., Harper, A. B., Hendry, M. A., Hewitt, A. J., Johnson, B., Jones, A., Jones, C. D., Keeble, J., Liddicoat, S., Morgenstern, O., Parker, R. J., Predoi, V., Robertson, E., Siahahaan, A., Smith, R. S., Swaminathan, R., Woodhouse, M. T., Zeng, G., and Zerroukat, M.: UKESM1: Description and Evaluation of the U.K. Earth System Model, *J. Adv. Model. Earth Syst.*, 11, 4513–4558, <https://doi.org/10.1029/2019MS001739>, 2019.

Semmler, T., Danilov, S., Gierz, P., Goessling, H. F., Hegewald, J., Hinrichs, C., Koldunov, N., Khosravi, N., Mu, L., Rackow, T., Sein, D. V., Sidorenko, D., Wang, Q., and Jung, T.: Simulations for CMIP6 With the AWI Climate Model AWI-CM-1-1, *J. Adv. Model. Earth Syst.*, 12, 1–34, <https://doi.org/10.1029/2019MS002009>, 2020.

Setu, T., Legese, T., Teklie, G., and Gebeyhu, B.: Effect of furrow irrigation systems and irrigation levels on maize agronomy and water use efficiency in Arba Minch, Southern, Ethiopia, *Heliyon*, 9, e17833, <https://doi.org/10.1016/j.heliyon.2023.e17833>, 2023.

Tatebe, H., Ogura, T., Nitta, T., Komuro, Y., Ogochi, K., Takemura, T., Sudo, K., Sekiguchi, M., Abe, M., Saito, F., Chikira, M., Watanabe, S., Mori, M., Hirota, N., Kawatani, Y., Mochizuki, T., Yoshimura, K., Takata, K., O'ishi, R., Yamazaki, D., Suzuki, T., Kurogi, M., Kataoka, T., Watanabe, M., and Kimoto, M.: Description and basic evaluation of simulated mean state, internal variability, and climate sensitivity in MIROC6, *Geosci. Model Dev.*, 12, 2727–2765, <https://doi.org/10.5194/gmd-12-2727-2019>, 2019.

Teso, E., Alamirew, T., and Olumana, M.: Predicting Runoff Yield using SWAT Model and Evaluation of Boru Dodota Spate Irrigation Scheme , Arsi Zone , Southeastern Ethiopia. East Shoa Zone Irrigation Development Authority, Thesis, Adama, Ethiopia., 95–113, 2010.

Tibebe, D. and Bewket, W.: Surface runoff and soil erosion estimation using the SWAT model in the Keleta Watershed, Ethiopia, *L. Degrad. Dev.*, 22, 551–564, <https://doi.org/10.1002/ldr.1034>, 2011.

Tumsa, B. C., Kenea, G., and Tola, B.: The application of SWAT+ model to quantify the impacts of sensitive LULC changes on water balance in Guder catchment, Oromia, Ethiopia, *Heliyon*, 8, e12569, <https://doi.org/10.1016/j.heliyon.2022.e12569>, 2022.

Voltaire, A., Saint-Martin, D., S n si, S., Decharme, B., Alias, A., Chevallier, M., Colin, J., Gu r my, J. F., Michou, M., Moine, M. P., Nabat, P., Roehrig, R., Salas y M lia, D., S f rian, R., Valcke, S., Beau, I., Belamari, S., Berthet, S., Cassou, C., Cattiaux, J., Deshayes, J., Douville, H., Eth , C., Franchist guy, L., Geoffroy, O., L vy, C., Madec, G., Meurdesoif, Y., Msadek, R., Ribes, A., Sanchez-Gomez, E., Terray, L., and Waldman, R.: Evaluation of CMIP6 DECK Experiments With CNRM-CM6-1, *J. Adv. Model. Earth Syst.*, 11, 2177–2213, <https://doi.org/10.1029/2019MS001683>, 2019.

Volodin, E. M., Mortikov, E. V., Kostykin, S. V., Galin, V. Y., Lykossov, V. N., Gritsun, A. S., Diansky, N. A., Gusev, A. V., Iakovlev, N. G., Shestakova, A. A., and Emelina, S. V.: Simulation of the modern climate using the INM-CM48 climate model, *Russ. J. Numer. Anal. Math. Model.*, 33, 367–374, <https://doi.org/10.1515/rnam-2018-0032>, 2018.

Wagesho, N., Jain, M. K., and Goel, N. K.: Effect of Climate Change on Runoff Generation: Application to Rift Valley Lakes Basin of Ethiopia, *J. Hydrol. Eng.*, 18, 1048–1063, [https://doi.org/10.1061/\(asce\)he.1943-5584.0000647](https://doi.org/10.1061/(asce)he.1943-5584.0000647), 2013.

Wakjira, M. T.: Understanding the impacts of climate variability and change on rainfed crop production in Ethiopia, ETH Zurich, 244 pp., <https://doi.org/10.3929/ethz-b-000672129>, 2024.

Wale, A., Sebnie, W., Girmay, G., and Beza, G.: Evaluation of the potentials of supplementary irrigation for improvement of sorghum yield in Wag-Himra, North Eastern, Amhara, Ethiopia, *Cogent Food Agric.*, 5, <https://doi.org/10.1080/23311932.2019.1664203>, 2019.

Wang, Y. C., Hsu, H. H., Chen, C. A., Tseng, W. L., Hsu, P. C., Lin, C. W., Chen, Y. L., Jiang, L. C., Lee, Y. C., Liang, H. C., Chang, W. M., Lee, W. L., and Shiu, C. J.: Performance of the Taiwan Earth System Model in Simulating Climate Variability Compared With Observations and CMIP6 Model Simulations, *J. Adv. Model. Earth Syst.*, 13, 1–28, <https://doi.org/10.1029/2020MS002353>, 2021.

Welderufael, W. A., Le Roux, P. A. L., and Hensley, M.: Quantifying rainfall-runoff relationships on the Dera Calcic Fluvic Regosol ecotope in Ethiopia, *Agric. Water Manag.*, 95, 1223–1232, <https://doi.org/10.1016/j.agwat.2008.04.007>, 2008.

Welle, S., Chantawarangul, K., and Nontananandh, S.: Effectiveness of Grass Strips as Barrier Against Runoff and Soil Loss in Jijiga Area, *Eff. Grass Strips as Barrier Against Runoff Soil Loss Jijiga Area*, 558, 549–558, 2006.

Wondatir, S. and Getnet, A.: Determination of supplementary irrigation water requirement and schedule for Sorghum in Kobo-Girana Valley, Ethiopia, *Int. J. Agric. Technol.*, 17, 385–398, 2021.

Wu, T., Lu, Y., Fang, Y., Xin, X., Li, L., Li, W., Jie, W., Zhang, J., Liu, Y., Zhang, L., Zhang, F., Zhang, Y., Wu, F., Li, J., Chu, M., Wang, Z., Shi, X., Liu, X., Wei, M., Huang, A., Zhang, Y., and Liu, X.: The Beijing Climate Center Climate System Model (BCC-CSM): The main progress from CMIP5 to CMIP6, *Geosci. Model Dev.*, 12, 1573–1600, <https://doi.org/10.5194/gmd-12-1573-2019>, 2019.

Zelege, Z. A.: Effect of Different Levels of Supplementary Irrigation on Yield and Yield Component of Maize (zea mays L) at Teppi, South West Ethiopia, *Int. J. Res. Stud. Agric. Sci.*, 6, 4–9, <https://doi.org/10.20431/2454-6224.0611002>, 2020.
